# A general principle of dendritic constancy – a neuron's size and shape invariant excitability

\*Hermann Cuntz<sup>a,b</sup>, Alexander D Bird<sup>a,b</sup>, Marcel Beining<sup>a,b,c,d</sup>, Marius Schneider<sup>a,b</sup>, Laura Mediavilla<sup>a,b</sup>, Felix Z Hoffmann<sup>a,b</sup>, Thomas Deller<sup>c,1</sup>, Peter Jedlicka<sup>b,c,e,1</sup>

<sup>a</sup> Ernst Strüngmann Institute (ESI) for Neuroscience in cooperation with the Max Planck Society, 60528 Frankfurt am Main, Germany

<sup>b</sup> Frankfurt Institute for Advanced Studies, 60438 Frankfurt am Main, Germany

<sup>c</sup> Institute of Clinical Neuroanatomy, Neuroscience Center, Goethe University, 60590 Frankfurt am Main, Germany

<sup>d</sup> Max Planck Institute for Brain Research, 60438 Frankfurt am Main, Germany

<sup>e</sup> ICAR3R – Interdisciplinary Centre for 3Rs in Animal Research, Justus Liebig University Giessen, 35390 Giessen, Germany

<sup>1</sup> Joint senior authors

\*cuntz@fias.uni-frankfurt.de

## Keywords

Electrotonic analysis, Compartmental model, Morphological model, Excitability, Neuronal scaling, Passive normalisation, Cable theory

## In brief

We show that realistic neuron models essentially collapse to point neurons when stimulated by randomly distributed inputs instead of by single synapses or current injection in the soma.

## Highlights

- A simple equation that predicts voltage in response to distributed synaptic inputs.
- Responses to distributed and clustered inputs are largely independent of dendritic length.
- Spike rates in various Hodgkin Huxley (HH) like or Leaky Integrate-and-Fire (LIF) models are largely independent of morphology.
- Precise spike timing (firing pattern) depends on dendritic morphology.
- NeuroMorpho.Org database-wide analysis of the relation between dendritic morphology and electrophysiology.
- Our equations set precise input-output relations in realistic dendrite models.

## Abstract

Reducing neuronal size results in less cell membrane and therefore lower input conductance. Smaller neurons are thus more excitable as seen in their voltage responses to current injections in the soma. However, the impact of a neuron's size and shape on its voltage responses to synaptic activation in dendrites is much less understood. Here we use analytical cable theory to predict voltage responses to distributed synaptic inputs and show that these are entirely independent of dendritic length. For a given synaptic density, a neuron's response depends only on the average dendritic diameter and its intrinsic conductivity. These results remain true for the entire range of possible dendritic morphologies irrespective of any particular arborisation complexity. Also, spiking models result in morphology invariant numbers of action potentials that encode the percentage of active synapses. Interestingly, in contrast to spike rate, spike times do depend on dendrite morphology. In summary, a neuron's excitability in response to synaptic inputs is not affected by total dendrite length. It rather provides a homeostatic input-output relation that specialised synapse distributions, local non-linearities in the dendrites and synaptic plasticity can modulate. Our work reveals a new fundamental principle of dendritic constancy that has consequences for the overall computation in neural circuits.

## Introduction

Because of their cell-type specific characteristic morphologies, dendritic trees have commonly been assumed to be crucial for a neuron's intrinsic computations. It has been shown that altering the morphology (Mainen and Sejnowski, 1996; Vetter et al., 2001) or the topology (van Elburg and van Ooyen, 2010; van Ooyen et al., 2002) of neurons while keeping the electrotonic features unchanged has a profound impact on the spiking behaviour of the cell. On the other hand, the morphology of dendrites has been shown to be largely predicted by connectivity rules (Cuntz et al., 2010) rather than by the specific computation that they perform. Also, dendrites were shown to follow general principles that equalise passive (Bird and Cuntz, 2016; Cuntz et al., 2007; Connelly et al., 2016; Jaffe and Carnevale, 1999) and active (Häusser, 2001; Magee, 2000) signal propagation indicating that the blueprints of computation for single neurons might be more stereotypical than previously assumed. In fact, principles of conservative scaling that preserve electrotonic features have been proposed for a number of cell types (Bakken and Stevens, 2011; Bekkers and Stevens, 1990; Cuntz et al., 2013). Similarly,

general morphological scaling laws, have been discovered for dendritic arbours of various sizes (Cuntz et al., 2012; Snider et al., 2010; Teeter and Stevens, 2011). However, it remains unclear how electrotonic and morphological scaling principles relate to one another and how their interplay would affect well-known neuronal computations in dendrites (e.g. Branco et al., 2010; Gabbiani et al., 2002; Poirazi et al., 2003b,a; Single and Borst, 1998). Therefore, we study here the dependence of input-output properties of dendrites on their size and shape.

One of the most eminent electrophysiological features of neurons that depend on dendritic shape is the input conductance (Koch et al., 1990; Rall et al., 1967). Smaller cells with smaller input conductances are more excitable for somatic current injections than larger cells because a voltage threshold for spike initiation is reached with a lower input current in accordance with Ohm's law (Chavlis et al., 2017; Šišková et al., 2014). This relation is true for somatic activation of neurons and its size- and shape-dependence of voltage responses is well understood. However, the corresponding effect of changes in input conductance on voltage responses to distributed synaptic inputs have not been sufficiently studied. Rules identified for current transfer within dendritic arbours (Bird and Cuntz, 2016; Cuntz et al., 2007; London et al., 1999; Rall and Rinzel, 1973; Rinzel and Rall, 1974) have allowed the prediction of responses to individual or a few synaptic inputs (Magee, 2000; Williams and Stuart, 2003). Similar rules should be applicable at the level of richer synaptic input but they have not yet been identified. In this work, we specifically address the question how neuronal firing rate and firing patterns are affected by dendritic size and shape in the case of multiple, distributed synaptic inputs. We show that passive electrotonic principles generally render the synaptically driven excitability of neurons invariable to length for the entire range of existing dendritic trees. Since this dendritic constancy principle supports the stability of neuronal spiking, it may complement other well-established synaptic and intrinsic mechanisms of firing rate homeostasis (Turrigiano and Nelson, 2004).

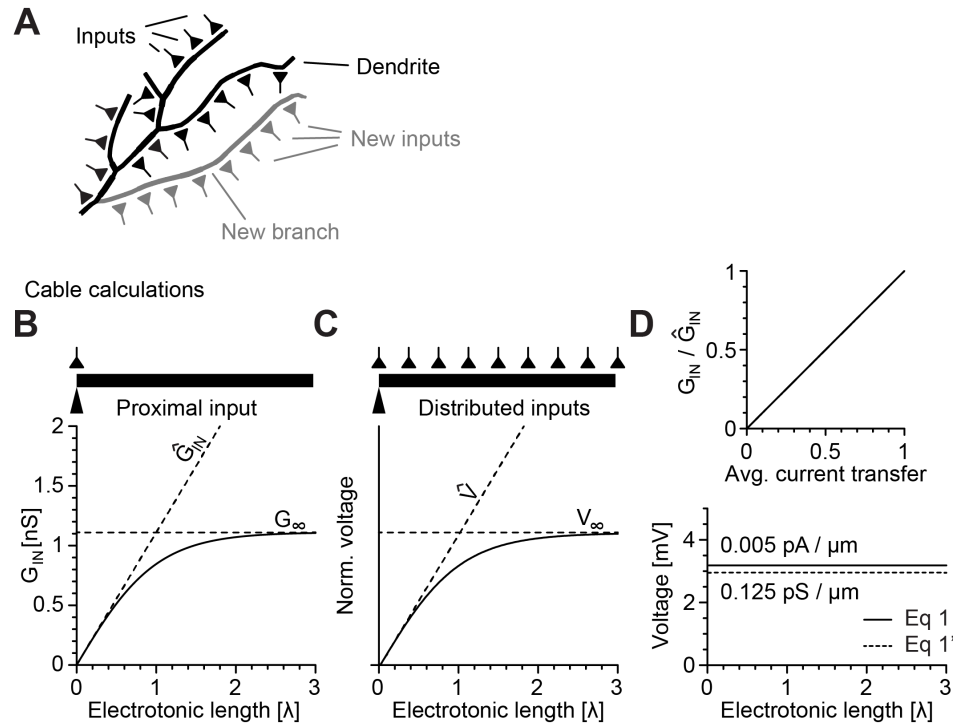

**Fig 1. Analytical prediction indicates that responses to distributed synaptic inputs in a cable are independent of cable length.**

**A**, Sketch illustrating the impact of a new branch on dendrite length and number of synapses. **B**, Input conductance  $G_{IN}$  of cables with constant diameters for a wide range of electrotonic lengths.  $G_{\infty}$ , the input conductance of a semi-infinite cable and  $\hat{G}_{IN}$ , the collapsed total membrane conductance are indicated by dashed lines for reference. **C**, Mean steady-state voltage responses to distributed inputs as a function of electrotonic length.  $V_{\infty}$ , the response to distributed synapses in the semi-infinite cable and  $\hat{V}$ , the linear extrapolation of the voltage response at the root and therefore the response in a collapsed cable are indicated by dashed lines. **D**, Bottom panel shows steady-state voltage responses at the proximal end to distributed current injections every  $\mu\text{m}$  (straight line, **Equation 1**) and to synaptic inputs every  $\mu\text{m}$  (dashed line, **Equation 1'**). Top panel shows the average current transfer versus the ratio of  $G_{IN}$  to  $\hat{G}_{IN}$  for the cables of varying lengths from **B**. Panels **B—D** were obtained from numerical simulations validating exactly the results of our analytical calculations.

## Results

57

The idea behind this work comes from the simple reasoning that while larger neurons are in principle less excitable they also receive more synapses (**Figure 1A**). The higher input conductance and resulting decreased excitability might therefore compensate for the increase of effective current the neuron receives through its synaptic inputs. In contrast to most traditional theoretical studies on dendritic integration with their focus on somatic activation

62

of the cell or activation with few synapses, we therefore focus here on the voltage responses to distributed synaptic inputs. In the following, we first study these relations analytically in the simple passive cable and subsequently move to passive and then active responses in dendritic trees with their full morphology.

## Analytical calculations for passive cables predict length-invariant responses to distributed synaptic inputs

Experimentally, the input conductance that predicts a neuron's excitability is most typically obtained from somatic current injection with concurrent somatic voltage measurements using Ohm's law to relate conductance, current and voltage. The corresponding analytical calculations for a simple dendritic cable are readily available from classical cable theory introduced to neuroscience by Wilfrid Rall. Considerations of current spread in a passive cylinder allow one to predict the input conductance  $G_{IN}$  for any cable of electrotonic length  $L$  measured in terms of  $\lambda = \sqrt{\frac{G_i d}{4G_m}}$ , the electrotonic length constant, a distance unit over which the voltage decays to about a third of the proximal voltage (Koch and Segev, 1999; Rushton, 1937). Here, the diameter is  $d$ , the specific axial conductance is  $G_i$  and the specific membrane conductance is  $G_m$ . For short cables,  $G_{IN}$  increases nearly linearly with  $L$  as it approximates the collapsed input conductance  $\hat{G}_{IN} = G_m \pi d \lambda L$  of the cable, the total sum of the membrane leak (**Figure 1B**). At the other extreme,  $G_{IN}$  at the proximal sealed end in a semi-infinite cable is  $G_\infty = G_m \pi d \lambda$ , the total conductance of a  $\lambda$  length cylinder since  $\hat{G}_{IN} = G_\infty L$ . For longer cables of electrotonic length  $L$ , the input conductance at the proximal end  $G_{IN}$  approaches  $G_\infty$  asymptotically as  $G_{IN} = G_\infty \tanh(L)$  (**Figure 1B**). More distal patches of membrane therefore contribute less and less to the total proximal input conductance, setting with  $G_\infty$  a lower bound for the overall excitability of the cell. In all cases, increasing either the diameter  $d$ , the specific axial conductance  $G_i$  or the specific membrane conductance  $G_m$  all increase the input conductance as well as  $G_\infty$ .

As mentioned earlier, apart from their larger input conductance, larger cells also receive more synaptic inputs if one considers constant synaptic density. In the case of very short cables, the increase in input conductance is intuitively perfectly compensated by the increase in number of synapses since both scale linearly with  $L$ . Interestingly, however, the impact of distal synapses onto voltage at the proximal end diminishes with distance in the very same way as the impact of a distal patch of membrane on the proximal input conductance. The

reference values  $V_\infty$ , the average proximal voltage in response to distributed synapses over the 94  
dendritic length of a semi-infinite cable, and  $\hat{V}$ , the voltage response of these synapses when 95  
they are collapsed to an isopotential piece of membrane, behave similarly to their respective 96  
input conductance counterparts  $G_\infty$  and  $\hat{G}_{IN}$  (**Figure 1C**). It can be shown analytically (see 97  
Methods, “Cable equation for responses to distributed inputs”, **Equations 3–7**) that, along 98  
the entire electrotonic length, input conductance and synaptic currents cancel one another 99  
precisely. Correspondingly, the average current transfer throughout the cable, i.e. the fraction 100  
of injected synaptic current that reaches the proximal cable end, is equal to the ratio of  $G_{IN}$  101  
to  $\hat{G}_{IN}$ , i.e. the fraction of overall conductance felt at the proximal cable end (**Figure 1D**, top 102  
panel). 103

The voltage responses to distributed current injections  $I_{dist}$  per unit length are therefore 104  
equivalent to the total current injected over the entire metric length  $l = \lambda L$  of the neuron into 105  
its collapsed membrane leak, i.e. 106

$$V_{dist} = \frac{I_{dist}l}{\hat{G}_{IN}} = \frac{I_{dist}}{G_m\pi d} \quad (1)$$

(**Figure 1D**, bottom panel, straight line). From this particular application of Ohm’s law to 107  
dendritic trees, the voltage response to distributed inputs is entirely independent of neuronal 108  
cable length while it depends only on the specific conductance per surface membrane  $G_m$  and 109  
the diameter  $d$  of the cable as well as  $G_i$ , since  $I_{dist}$  is defined per unit electrotonic length. This 110  
is in stark contrast with voltage responses to proximal “somatic” current injections where 111  
 $V = \frac{I}{G_\infty \tanh(L)}$ , and length impacts the excitability of a neuron by decreasing  $V$  dramatically 112  
when increasing  $L$ . It is clear, however, that in a realistic setting, excitatory neuronal inputs 113  
produce synaptic currents that are distributed over the dendritic tree rather than being somatic. 114  
In fact, synaptic currents flow through synaptic conductances that further increase the overall 115  
conductance per unit length assuming that synaptic densities are homogeneous and constant. 116  
The corresponding voltage responses to distributed synaptic conductances are therefore 117  
slightly lower than the ones from current injections. However, also these effects remain 118  
independent of total cable length: 119

$$V_{syn} = \frac{I_{syn}}{G_m\pi d + G_{syn}} \quad (1')$$

(**Figure 1D**, dashed line). In conclusion, our analytical calculations and numerical simula- 120  
tions reveal a new electrotonic principle of dendritic constancy ensuring an equal impact of 121

distributed synaptic inputs in a passive cable independent of its length.

122

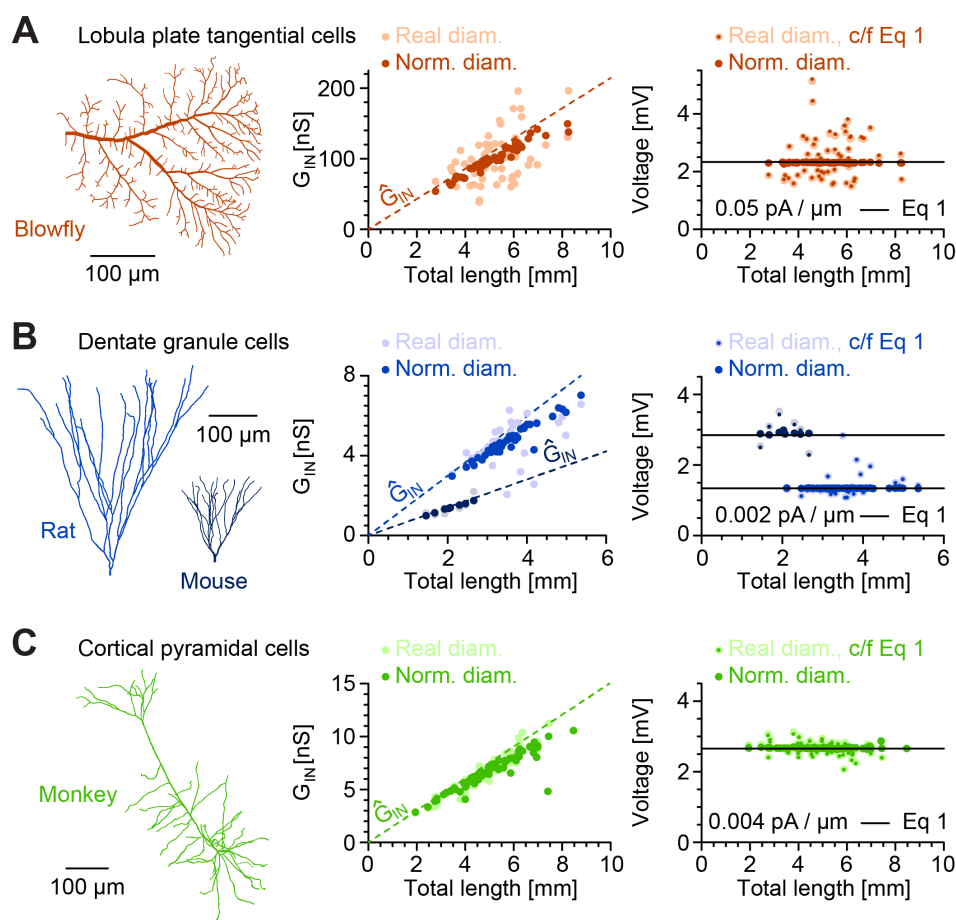

**Fig 2. Passive steady-state model responses to distributed synaptic inputs are independent of dendrite length, topology and diameter distribution.**

Sample morphologies (left), their input conductances (middle panels) and responses to steady-state distributed inputs (rightmost panels) compared with the prediction from **Equation 1**. **A**, Blowfly Lobula Plate tangential cell (TC) dendrites (red,  $n = 55$ ) with  $G_m$  of  $500 \frac{\mu S}{cm^2}$ ; **B**, Dentate gyrus granule cells (GCs) of rat (light blue,  $n = 43$ ) and mouse (dark blue,  $n = 8$ ) with  $G_m$  of  $26.3 \frac{\mu S}{cm^2}$  — differences in the species come from different average diameters in the two populations; **C**, Monkey cortical pyramidal cell (PC) dendrites (green,  $n = 69$ ) with  $G_m$  of  $38 \frac{\mu S}{cm^2}$ . Each dot corresponds to one morphology; lighter dots are original morphologies without diameter normalisation. Large darker dots are results for morphologies with diameters normalised to the average of their respective population; small darker dots are individual predictions from **Equation 1** for each non-normalised morphology with its respective average diameter. Straight black lines show predictions from **Equation 1** using the average diameter of each population of morphologies and their respective  $G_m$ . The dashed lines show the collapsed input conductance  $\hat{G}_{IN}$  as it increases linearly with the total amount of cable.



## Passive responses encode percentage of active synaptic inputs in a manner that is largely independent of branching topology and dendrite length

Importantly, the principle of dendritic constancy found in the construction of the simple cable with constant diameter can be generalised to branched and tapered neuronal morphologies. We show this at the example of Lobula Plate tangential cells (TCs,  $n = 55$ ) in the blowfly, dentate gyrus granule cells (GCs) in rat ( $n = 43$ ) and mouse ( $n = 8$ ) and cortical pyramidal cells (PCs,  $n = 69$ ) in the monkey with their respective  $G_m$  under steady-state distributed inputs (**Figure 2**). These three datasets were chosen to represent a very leaky large cell (TC), a small and electrotonically compact cell (GC) and the most typical cortical cell (PC) from a range of different species. Normalising the average diameters to the overall average diameter  $d$  of the respective datasets shows that the steady-state responses are independent of branching patterns and diameter taper (compare larger dark dots with black lines in rightmost panels in **Figure 2**). In addition, the individual voltage responses of each cell with their original diameters were well predicted by **Equation 1** (small dark dots in rightmost panels of **Figure 2**) with normalised root mean square errors (nRMSE) of 1.3% for TCs, 0.9% for GCs, and 1.2% for PCs.

Our prediction also accounts for responses to a smaller proportion of activated synapses, i.e. a lower synaptic density, with voltage responses linearly relating with the percentage of active synapses. However, it is important to show what effect a specific, more clustered, distribution of synapses would have on the overall responses in individual neurons. We therefore titrated for any given percentage of active synapses the two most extreme distributions: We compare voltage responses to the activation of a given proportion of the most distal (**Figure 3**, solid lines) and, respectively, the most proximal (**Figure 3**, dashed lines) synapses. Even under such clustering of active synapses, neurons seemed to be able to encode the percentage of active synapses with their root voltages both in the steady-state (**Figure 3**, middle panels) and in dynamic simulations (**Figure 3**, right panels) following **Equation 1'** that includes the synaptic conductances present in these simulations. Importantly, passive somatic voltage responses reflected the percentage of active synaptic inputs independently of morphological complexity and dendrite length (compare **Figure 3A** with **Figures 3B and C**).

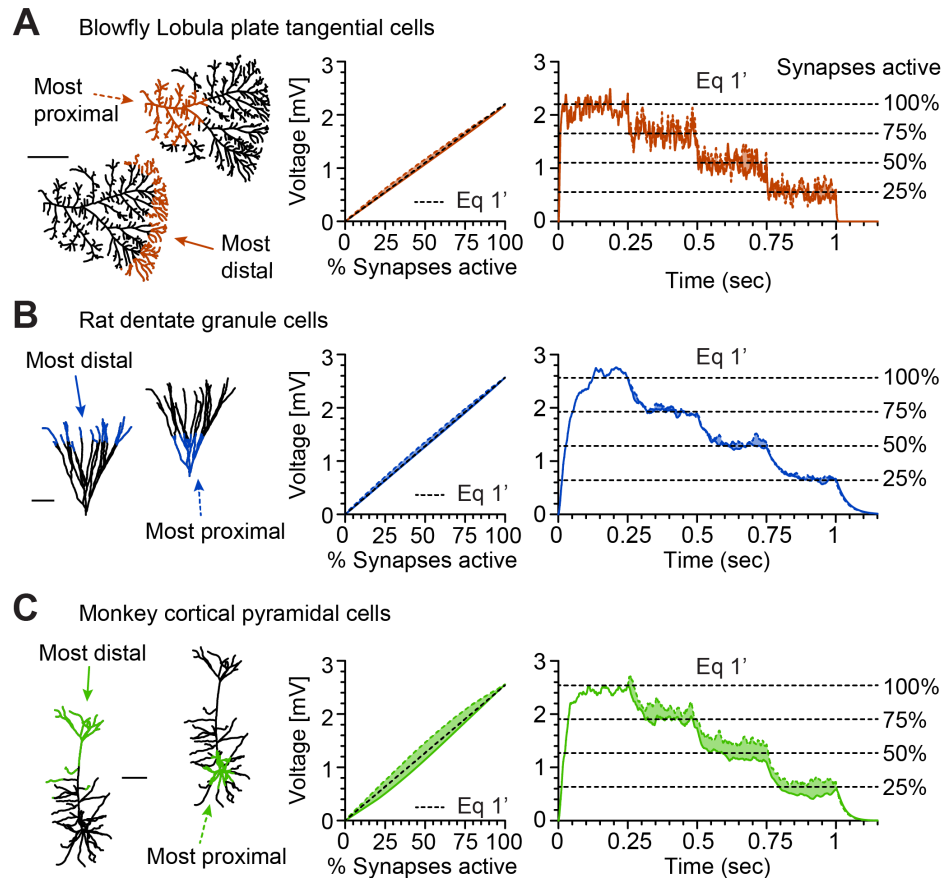

**Fig 3. Passive model voltage responses follow relative percentage of active synapses even when these are clustered.**

Synapse distributions (left), steady-state responses to partial activation of synapses (middle) and responses to sample levels of (100%, 75%, 50%, 25% and 0%) in dynamic simulations (rightmost panels). **A**, **B**, and **C**, each single out one morphology (the one shown on the left) from the populations used in **Figure 2** (using the same colour scheme). Dashed coloured lines are the responses to the most proximal synapses while solid coloured lines show the responses to the activation of the most distal synapses. The space in between both responses is shaded. For example, the 25% line means that the 25% most proximal synapses were active (dashed lines) and in a second simulation the 25% most distal synapses were active (solid lines). Black dashed lines are predictions from **Equation 1'** that include the synaptic conductance. Scale bars show  $100\mu m$ .

Next, we tested whether the principle of dendritic constancy holds across diverse dendrite 152  
 branching patterns and sizes in a large number of different cell types. Indeed, our calculation 153  
 for the steady-state voltage response to distributed inputs in the simple cable yielded good 154  
 predictions for the wide range of real dendritic morphologies from the July 2016 version of 155  
 the NeuroMorpho.Org database (Ascoli, 2006). We selected those datasets (223 datasets, 9,841 156  
 reconstructions, **Table S1**) that contained dendritic morphologies with sufficient detail in 157

all three dimensions and with reconstructed diameters (see Methods). Input conductances 158  
and steady-state voltage responses to distributed inputs were calculated after normalising 159  
the diameters to an average  $1\mu m$  and for generic values of  $G_m$  of  $50\frac{\mu S}{cm^2}$  that are typical for 160  
cortical pyramidal cells (**Figure 4A**). We observed here that very large trees exhibited a trend 161  
to smaller voltage responses. We found similar results in morphological models for dendritic 162  
trees based on minimum spanning trees (Cuntz et al., 2007, 2010, 2012) covering a very large 163  
range of possible complexities and overall sizes in synthetic dendrites (**Figure S1**). Also, 164  
the dynamic responses to synaptic stimulation were well predicted for morphologies from 165  
NeuroMorpho.Org using **Equation 1'** but very small trees showed strong fluctuations because 166  
of the small number of synapses there (**Figure 4B**). Overall, the responses were faithful to our 167  
prediction over a range of four orders of magnitude of dendritic length (nRMSE of 5.1% for 168  
the steady state responses compared with **Equation 1**). 169

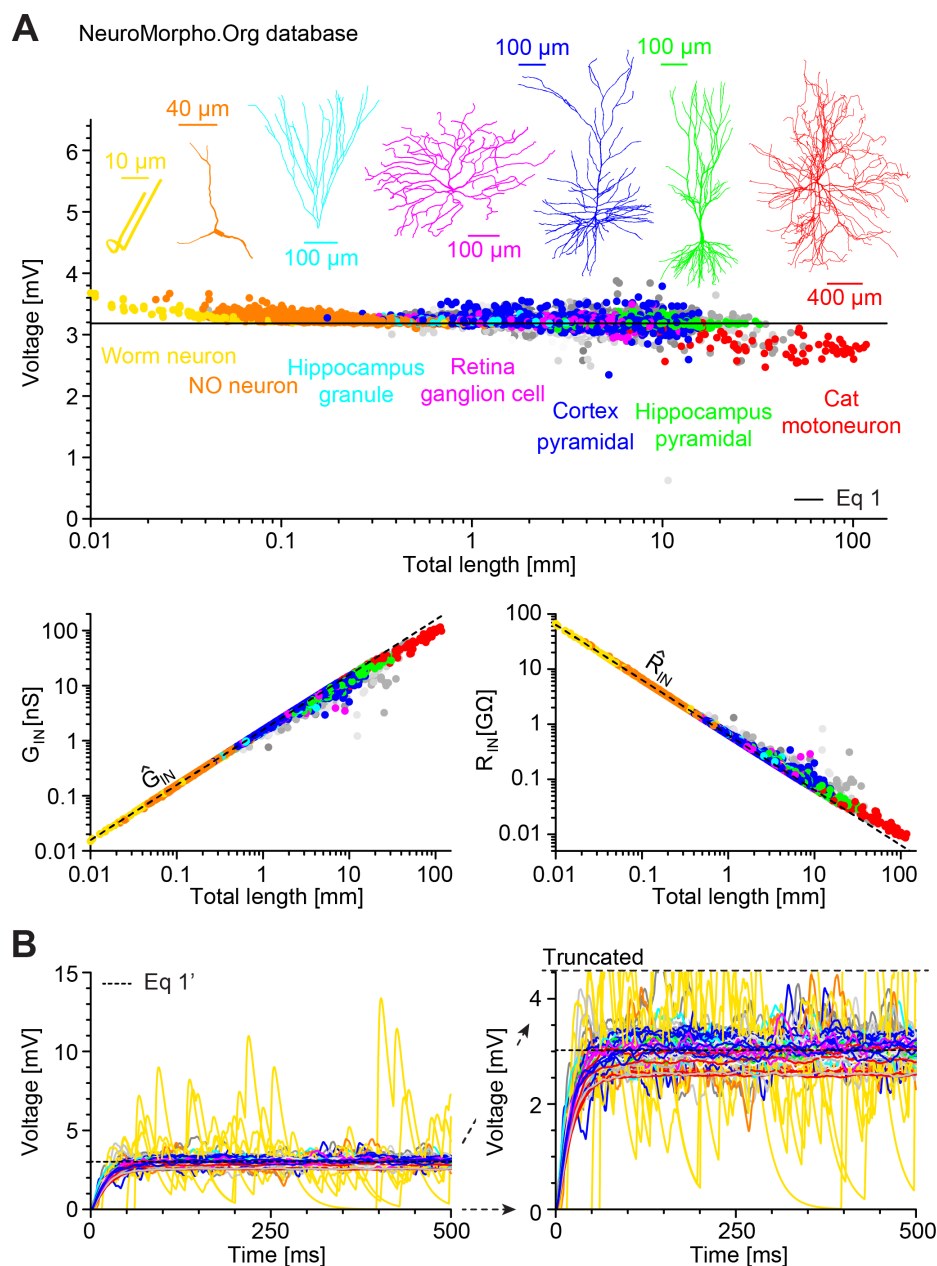

**Fig 4. NeuroMorpho.Org database-wide analysis reveals neuronal size and shape invariant passive model responses to distributed inputs.**

**A**, Voltage responses to distributed inputs with  $G_m$  of  $50 \frac{\mu\text{S}}{\text{cm}^2}$  in a large selection of all morphologies from NeuroMorpho.Org (223 datasets, 9,841 reconstructions, **Table S1**) after normalisation of average diameters to  $1 \mu\text{m}$ . Larger consistent subgroups are indicated by colours, representative morphology and label. Unlabelled smaller groups are different shades of grey in the background. The straight line indicates the analytical prediction from **Equation 1** for an unbranched cable. Input conductances  $G_{IN}$  (left bottom) and input resistances  $R_{IN}$  (right bottom) are indicated in the same colour code as in the top panel and compared to the case where the overall membrane was collapsed in  $\hat{G}_{IN}$  and  $\hat{R}_{IN}$  respectively (dashed lines). **B**, Passive dynamic responses and prediction from **Equation 1'** (dashed line) in the first morphology of each of the 223 datasets, similarly to the three morphologies in **Figure 3**, rightmost panels. Since small worm neurons (yellow) exhibited large fluctuations around the mean, this panel is shown at two different scales.

## Spike frequency but not temporal sequence of spikes is independent of model dendrite shape and size in response to distributed synaptic inputs

So far, we have shown a fundamental aspect of passive normalisation of the neural response to synaptic inputs that seems true for all dendritic morphologies. In the following, we used a classical spiking model of cortical pyramidal cells (Mainen et al., 1995; Mainen and Sejnowski, 1996) to test whether our principle of dendritic constancy translates to active spiking neurons. When incorporated in diverse neuronal morphologies from different cell types, this spiking mechanism was previously shown to exhibit strongly varying spiking patterns for somatic current injections (**Figure 5A**, top row; similar analysis to the original paper using the model #2488 from ModelDB however with normalised average diameters for a better comparison with our predictions, see Methods) (Mainen and Sejnowski, 1996). To quantify the spiking behaviour in four different cell types we plotted firing rates as a function of injected current into the soma (*f*-*I*-curves, **Figure 5B**, top panel). As expected, the spiking frequency increased with decreasing dendrite size rendering smaller cells more excitable. We used interspike interval (ISI) distributions to characterise the temporal structure of the spike trains (bursting vs. non-bursting) in the different morphologies (**Figure 5B**, bottom panel, ISI distribution refers to single cell firing). L5 pyramidal cells exhibited bursts of three spikes (as indicated by a larger proportion of short ISIs) and L3 pyramidal cells bursts of two spikes (as indicated by two equal peaks in the ISI distributions). Interestingly, when stimulated by distributed synaptic inputs instead of somatic current injections, the differences in the temporal structure of the spiking (bursting vs. non-bursting) remained dependent on the respective morphology with similar ISI distributions as well as coefficients of variation (*cv*) (**Figure 5C**, bottom panel). However, the numbers of spikes were equalised and were independent of dendritic tree size irrespective of the frequency of stimulation (**Figure 5A**, bottom traces, and **Figure 5C**, top panel). The equalised passive voltage responses predicted by our dendritic constancy (**Figure 5C**, rightmost panel, bottom traces, subthreshold) were transformed into equal number of spikes in the active model (**Figure 5C**, rightmost panel, top traces). Taken together, in response to distributed synaptic inputs, spike numbers (frequencies) were independent of morphology while spike times (as reflected in the temporal structure of the spiking in the form of bursting vs. non-bursting) remained affected by morphological properties of dendrites in line with previous observations by Mainen and Sejnowski (1996) for responses to somatic current injections.

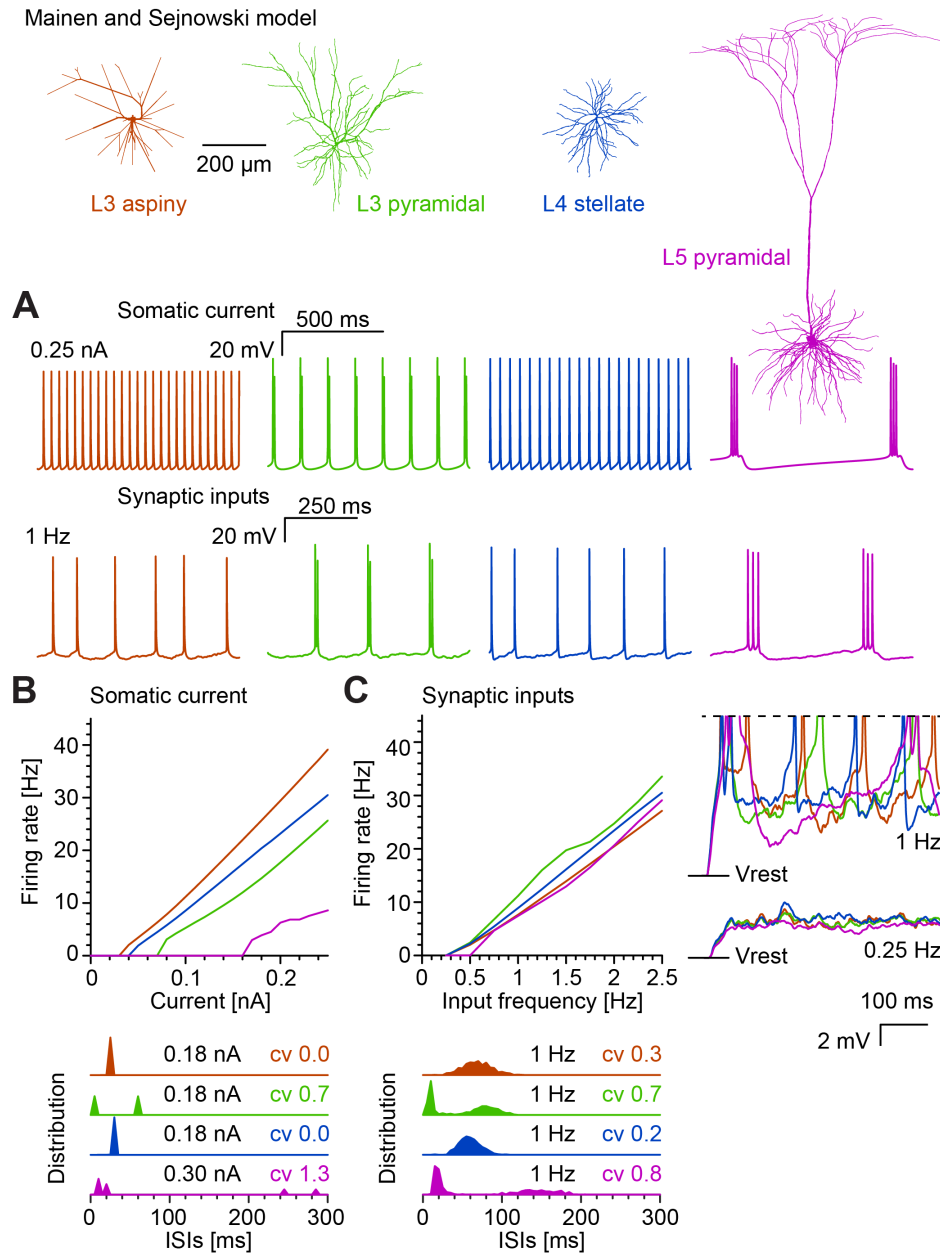

**Fig 5. Neuron size- and shape-invariant responses to distributed inputs in spiking neurons.**

Simulations using the spiking mechanism by Mainen and Sejnowski (1996) in their four sample morphologies of L3 aspiny (dark orange), L3 pyramidal (green), L4 stellate (dark blue), and L5 pyramidal (pink) cells after normalising the diameters. **A**, Sample voltage traces for  $0.25\text{nA}$  current injections into the soma (top, similar to Figure 1 in the original work; see Methods) and distributed synaptic inputs at  $1\text{Hz}$  (bottom). **B**, Firing rate vs. current injection in the soma and **C**, responses to distributed synaptic inputs for the same four cases. Sample subthreshold (bottom,  $0.25\text{Hz}$ ) and suprathreshold (top,  $1\text{Hz}$ ; truncated spikes at dashed line) synaptic activation in the four morphologies are shown in the rightmost panels. Interspike interval (ISI) distributions are shown below the respective panels for  $40\text{sec}$  simulations at indicated current injections and synaptic activation with corresponding coefficients of variation (cv). Note the two peaks in ISI distributions of L3 and L5 pyramidal cells indicative of their bursting. Colours indicate the different morphologies from **A** throughout the figure.

In order to verify that the results in the model by Mainen and Sejnowski were not model-specific, we performed similar simulations in two distinct well-established active models of CA1 pyramidal cells by Jarsky et al. (2005) and Poirazi et al. (2003b). We integrated the corresponding active ion channel models into the set of all good reconstructions of hippocampal pyramidal cell morphologies ( $n = 105$ ) from NeuroMorpho.Org after normalising their diameters to  $1\mu m$  (**Figure 6A**). The model by Jarsky et al. has previously been used to study the separate effects of inputs from Schaffer collaterals (SC) and the perforant path (PP) (Jarsky et al., 2005). This gave us the opportunity to compare our results for distributed inputs over the entire dendrite with results for inputs that were clustered in a more realistic manner according to their anatomical (layer-specific) origin. In this case we compared stimulating all synapses with  $1Hz$  (**Figure 6B**, black dots) and, separately, only synapses impinging on the basal dendrites (**Figure 6B**, red dots) or on the distal apical dendrite and tuft region (**Figure 6B**, cyan dots). Remarkably, in all cases, the firing rates were independent of neuron size. Again, the number of spikes was indicative of the percentage of active synapses scanned in a similar manner to **Figure 3** (**Figure 6B**, rightmost panel). In particular, the corresponding input-output functions were almost identical when measured in two different sample morphologies of radically different total dendritic length (**Figure 6B**, rightmost panel, compare both sets of solid and dashed lines).

A second model of CA1 pyramidal cells by Poirazi et al. (2003b) has become archetypal for compartmentalised computations in dendrites. Similarly to the model by Jarsky et al., we incorporated the ion channel models by Poirazi et al. into the NeuroMorpho.Org collection of hippocampal pyramidal cell morphologies and subjected the individual compartmental models to various combinations of distributed synaptic inputs. The model by Poirazi et al. produced large dendritic events that were distinct from the somatic action potentials (**Figure 6C**, voltage traces red – dendrite vs black – somatic). Intriguingly, both numbers of somatic spikes and large dendritic events were independent of total dendritic length (**Figure 6C**, left lower and upper panels respectively).

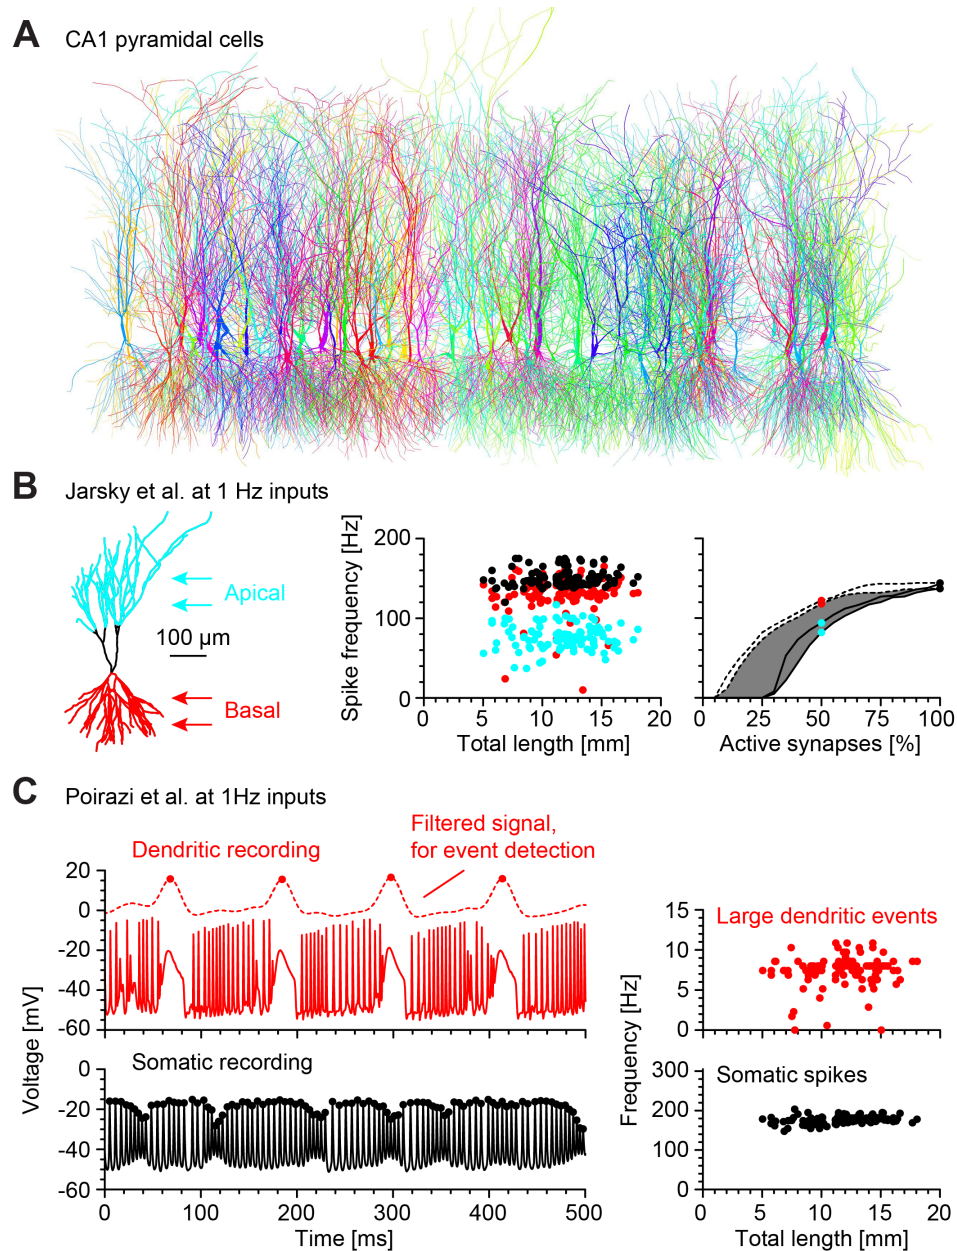

**Fig 6. Dendritic constancy in two active models of hippocampal CA1 pyramidal neurons including dendritic spikes and clustered inputs.**

**A**, All 105 morphologies of rat hippocampal pyramidal cells from NeuroMorpho.Org that passed our manual curation criteria (Colours are random). **B**, CA1 pyramidal cell model by Jarsky et al. (2005) with its responses to distributed synaptic inputs  $500pS$ ,  $1Hz$  in the set of all 105 morphologies. Black dots show spiking responses to activation of all synapses while red (basal) and cyan (apical) show responses to activation of subregions of the dendrite as indicated in the sketch on the left. Rightmost panel shows spike output analysis for selective activation of a subset of all most proximal (dashed line) and most distal synapses (solid line). Since roughly 50% of synapses were active in both the basal and apical stimulations, corresponding values of the curve for proximal (red) and distal (cyan) synapses are highlighted in the rightmost panel as well as values for all synapses (black). The two sets of curves (two dashed, two solid lines, respectively) represent two morphologies of radically different size ( $10mm$  vs.  $15mm$  of total dendritic length). See next page.



**Fig 6. (continued)** The shaded area highlights the range of responses in clustered synapses for the morphology shown in the inset. C, CA1 pyramidal cell model by Poirazi et al. (2003b) driven by distributed synaptic inputs  $500pS$ ,  $1Hz$  in the set of all selected 105 hippocampal pyramidal cell morphologies from NeuroMorpho.Org. Top row, Large dendritic events (red dots) were measured at the branch with highest  $y$  value respectively and detected after low pass filtering the local voltage signal there with a Gaussian filter with variance of  $100ms$  (see dashed line). Bottom row, Somatic events (black dots) as measured directly from the somatic voltage, shown for one sample morphology. Rightmost panels show resulting frequency of somatic (black, bottom) and dendritic (red, top) events with one point each per morphology as a function of total dendritic length.

## Spiking reset converts constant membrane voltage into constant spike rates 229

The results from the active compartmental models pose the question as to why the constant voltages transform into constant numbers of spikes. Such a transformation could be a consequence of each spike essentially shunting and resetting the entire neuron (Häusser, 2001) while erasing its voltage history. Under these assumptions, a leaky integrate-and-fire (LIF) (Stein, 1965) mechanism coupled to the dendrite could help elucidate the constancy of spike numbers. We chose to implement a LIF that resets the voltage throughout the entire dendritic tree after passing a threshold voltage at the dendrite's root. Incorporating such a spiking mechanism in the four cell types of **Figure 2**, yielded an output spiking frequency that was indeed independent of dendritic length (**Figure 7A**) for any given synaptic input frequency. In fact, the entire input-output (IO) curves were essentially independent of the morphology (**Figure 7B**). We then derived an analytical solution for the transformation of variable synaptic input activity into firing rate output (see Methods, **Equations 10–22**). In line with our numerical LIF simulation results (**Figure 7A, and B**), the mean analytical voltage response to stochastic inputs in a uniform cable was independent of length. The variance of the subthreshold voltage response decayed to a constant for dendrites of total electrotonic length greater than one. Our analytical predictions for the IO relationship (Brunel and Hakim, 1999) are 230  
231  
232  
233  
234  
235  
236  
237  
238  
239  
240  
241  
242  
243  
244  
245  
246

$$R^{-1} = \tau \int_0^\infty \frac{1}{z} e^{-\frac{z^2}{2}} \left( e^{z \frac{v_{th} - \mu_v}{\sigma_v}} - e^{z \frac{v_{re} - \mu_v}{\sigma_v}} \right) dz \quad (2)$$

with firing rates  $R$  for subthreshold voltage mean  $\mu_v$  and standard deviation  $\sigma_v$  impinging on a membrane with time constant  $\tau$ , firing threshold  $v_{th}$ , and voltage reset  $v_{re}$ .  $R$  always converges to constant values for cable lengths longer than the electronic length (see Methods, **Equations 10–22, Figure 7B bold black lines**). Importantly,  $R$  is practically independent of dendritic length, if the mean afferent drive is sufficiently strong and so the output firing rate 247  
248  
249  
250  
251

is less dependent on fluctuations (as seen in **Figure 7A**). In our case in **Figure 7B**, the specific 252  
membrane conductance in the different cell types determined the slope of the IO curves with 253  
a very sharp slope in the leaky blowfly TC that in reality produces spikelets and shallower 254  
curves in the other cell types with lower conductivity through the membrane. Interestingly, 255  
the percentage of active synapses was encoded in the number of spikes (**Figure 7C**) in analogy 256  
to the voltages in **Figure 3** (compare with IO curves in **Figure 7B**). Again, this was true even 257  
for clustered synapses (plots show most distal synapses as solid lines vs. most proximal 258  
synapses as dashed lines). 259

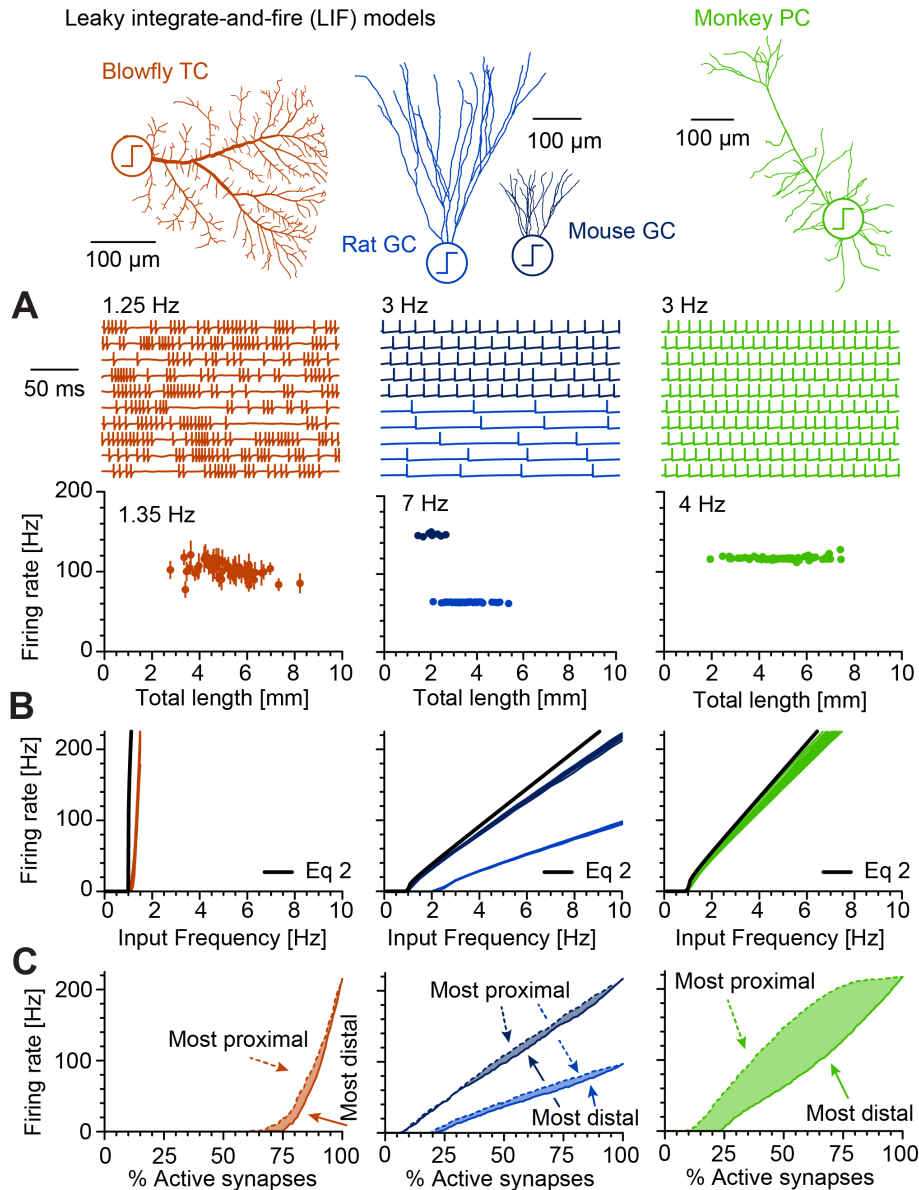

**Fig 7. Spiking responses to distributed inputs in leaky integrate-and-fire (LIF) neurons with realistic dendritic morphologies as the source of leak indicate that voltage reset throughout the entire dendritic tree contributes to spike rate constancy.**

LIF mechanism in its simplest form (without adding soma or axon, the LIF resets the voltage in the entire dendrite after spiking) introduced into the dendritic root of the cell types from **Figure 2** with the same colours and membrane properties. **A**, Top row, Sample spike trains for 10 different TC, 5 rat GC, 5 mouse GC and 10 monkey PC dendritic morphologies are shown underneath the corresponding morphologies. Bottom row, Firing rates are shown with error bars (standard deviation, invisible in GCs and PCs) for one selected input frequency for each cell type are shown as a function of length. **B**, Input-Output (IO, Frequency of synaptic activation vs. spiking frequency) plots for all available morphologies for TCs (left), mouse and rat GCs (middle) and monkey PCs (right). Respective cable calculations from **Equation 2** that are independent of length are shown as bold black lines. **C**, Responses to selective activation of the most proximal (dashed lines) and most distal (solid lines) synapses in the dendrite. The areas between these two extreme scenarios for clustered synapses are shaded.

Similarly, incorporating the LIF mechanism into the dendritic morphologies of the Neuro- 260  
Morpho.Org database (with a uniform specific membrane conductance, see **Figure 4**) yielded 261  
invariant IO curves over a very large range of morphologies. Only the IO curves from tiny 262  
worm neurons (yellow) and very large spinal cord motoneurons (red) deviated from the re- 263  
maining curves (**Figure 8A**, LIF model, compare also these results with analytical predictions 264  
from **Equation 2**). In the same morphologies, we also showed spike number invariance using 265  
an adaptive exponential LIF (AdExpLIF) (Brette and Gerstner, 2005) for two specific temporal 266  
patterns of spikes typically seen in compartmental models, a bursting mode and spiking mode 267  
with spike frequency adaptation (**Figure 8B and C**, AdExpLIF model). Overall, LIF based 268  
spiking models were consistent with the dendritic constancy of passive voltage responses to 269  
distributed synaptic inputs transforming into constant spike numbers that were independent 270  
of dendritic length or shape. 271

Leaky integrate and fire (LIF) in NeuroMorpho.Org dendrites

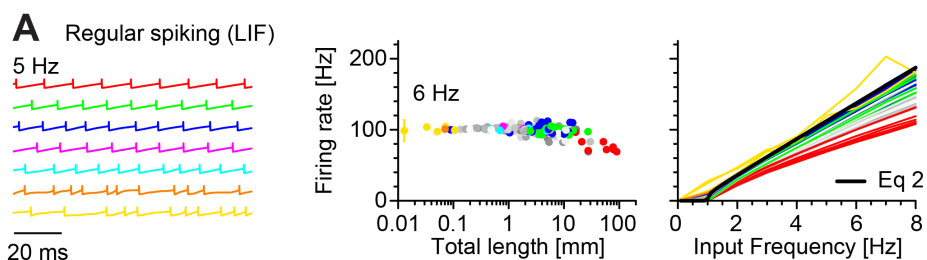

Adaptive exponential LIF (AdExpLIF) in NeuroMorpho.Org dendrites

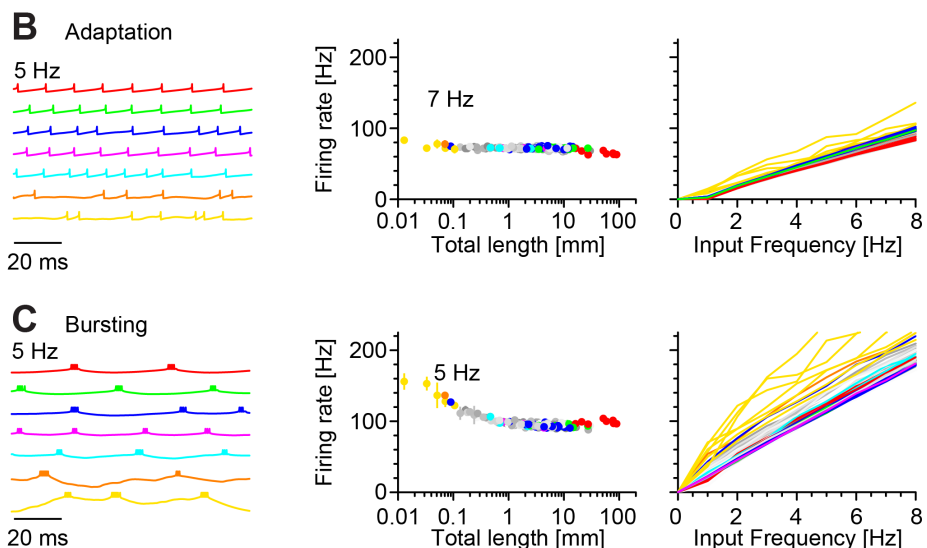

**Fig 8. NeuroMorpho.Org database-wide spiking responses to distributed inputs in leaky integrate-and-fire (LIF) and adaptive exponential LIF (AdExpLIF) neurons are independent of dendritic size and shape.**

Similar panels as in **Figure 7A and B** but for all morphologies from **Figure 4** with the respective membrane properties used there: Sample voltage traces in sample morphologies for all seven morphological categories (left panels), firing rates in response to a given input frequency (middle panels, input frequency is indicated), and IO curves (right panels). Colours as in **Figure 4** in increasing dendrite size: Yellow (worm neurons); orange (nitergic neurons); cyan (hippocampal granule cells); pink (retinal ganglion cells); blue (cortical pyramidal cells); green (hippocampal pyramidal cells); red (cat motoneurons). **A**, Regular leaky integrate-and-fire (LIF) spiking mechanism incorporated in all dendritic morphologies. Similarly to **Figure 7**, calculations from **Equation 2** are shown as a bold black line. **B**, Adaptive exponential LIF (AdExpLIF) that includes an additional channel for spike frequency adaptation and results in less regular spiking. **C**, Long time constant in the adaptation channel of the AdExpLIF for testing our dendritic constancy theory under extreme burst firing.

## Discussion

In this work, we used analytical methods to demonstrate a general principle of dendritic constancy regarding the voltage and spiking responses to distributed synaptic inputs. Synaptic inputs effectively encounter an apparent input conductance in the soma (i.e. the transfer conductance) corresponding to the collapsed membrane leak of the entire dendrite onto the soma. As a consequence, more synaptic currents in larger cells are precisely compensated by the additional dendritic leak. Our dendritic version of Ohm's law (**Equation 1** and **Equation 1'** as well as **Equation 2** for spikes with variable inputs) is independent of morphological features and spiking mechanisms and predicts isoelectrotonic behaviour for anatomically distinct dendritic trees shaped by species-specific scaling (Beining et al., 2017; Cuntz et al., 2013), developmental expansion (Mckay and Turner, 2005) or neurodegenerative shrinkage (Platschek et al., 2016). Finally, our simulations in a classical model by Mainen and Sejnowski (1996), as well as other established spiking models (Jarsky et al., 2005; Poirazi et al., 2003b) and LIF models showed that synaptic stimulation in different dendritic trees leads to similar responses in terms of firing rates but not patterns (spike times). This was true for uniformly activated synapses but also to a large degree for clustered synapses, so much so, that the somatic firing rate allowed for an approximate estimation of the percentage of active synapses independent of their dendritic location. Taken together, our analytical and numerical results imply that the principle of voltage and spike rate constancy is general since it holds in all (branched and unbranched) dendritic arbours activated by distributed synaptic conductances.

## Limitations for dendritic constancy

What are the assumptions and limitations of our computational analysis? First, dendritic constancy will be affected by a number of dendritic features. The voltage responses do depend on the specific membrane conductances and average dendritic diameters. While average dendritic diameters do not seem to vary much in the NeuroMorpho.Org database (**Figure S2**),  $G_m$  values are known to vary between cell types (Borst and Haag, 1996) (**Figures 2, 3 and 7**) and also within cell types (e.g. Garden et al., 2008). In addition, the somatic membrane leak affects the dendritic constancy results when somata are very large compared to the overall dendritic membrane if their diameters are not normalised together with the dendrites (i.e. if they do not scale with dendrite length) and if they do not receive synaptic inputs (**Figures S2 and S3**).

Second, in our analysis, we assumed uniform kinetics, conductances and reversal potentials of synaptic inputs. In this respect, it would be interesting to further explore models with variations in distance-dependent synaptic properties (Häusser, 2001; Magee and Cook, 2000) as well as democratising effects on distal synapses (London and Segev, 2001; Rudolph and Destexhe, 2003). Here, we show for a distance-dependent linear gradient of maximal synaptic conductance (increasing with dendritic path length from the root) that dendritic constancy is preserved in the hippocampal CA1 pyramidal cell model by Jarsky et al. and in the NeuroMorpho.Org morphologies (**Figures S4A and B**). Furthermore, our analytical solutions predict that dendritic constancy applies also to inhibitory synapses with negative reversal potentials (same models, **Figures S5A and B**). However, the effects of layer-specific somatic or dendritic inhibition, introducing local or distant shunts (Gidon and Segev, 2012) and their interaction with active channels (see below) need to be studied in detail.

Third, it also remains unclear how dendritic non-linearities such as dendritic NMDA or calcium spikes would operate in the context of our dendritic constancy principle. Such non-linear computations would include dendritic integration features known to play a role depending on relative locations of synaptic inputs (Branco et al., 2010; Cuntz et al., 2003; Poirazi et al., 2003b; Polsky et al., 2004). Surprisingly, our active cortical and hippocampal models exhibited dendritic constancy (without requiring any specific tuning) of spike numbers and even in the numbers of dendritic active events in the model by Poirazi et al. (**Figures 6C**). However, many further aspects related to dendritic voltage-dependent channels remain to be explored. For instance, potassium channels and H-channels are capable of affecting local synaptic potentials as well as backpropagating spikes (Chen et al., 2006; Magee, 1999). It would be intriguing to test how these channels shape dendritic constancy for synchronous or asynchronous, clustered or distributed synaptic inputs.

Fourth, it remains to be determined how dendritic constancy might interact with recently described homeostatic plasticity of the axon initial segment (AIS) in the form of activity-dependent changes in its location and length and in the distribution of its ion channels (Adachi et al., 2015; Kuba, 2012). Decreased or increased synaptic activity can induce homeostatic lengthening or shortening of the AIS with a compensatory increase or decrease in neuronal excitability respectively (Evans et al., 2015; Kuba et al., 2010). However, the effect of AIS length or location on excitability is more complex and depends on neuronal size (Gulledge and Bravo, 2016). Therefore, further computational and experimental analyses are needed to

better understand the link between the neuron's size and shape invariant excitability that we describe here and AIS plasticity.

Of particular interest is our observation that spike times rather than spike numbers remained affected by morphological properties of dendrites in a similar manner to responses to somatic current injections (Mainen and Sejnowski, 1996). Our simulations revealed that in the case of synaptic stimulation, both dendritic constancy as well as variability in firing patterns were maintained at the same time in active models of four different reconstructed cortical cell types. Although two cortical cell models displayed regular firing and the other two bursting, all of them generated similar firing rates. The somatic bursting behaviour has been previously explained as a consequence of delayed dendritic depolarisations and subsequent return currents from dendrites, arising due to two key factors: (1) moderate coupling resistance between somatic and dendritic regions in combination with (2) separated distributions of fast and slow active channels in soma and dendrites (Mainen and Sejnowski, 1996). Our synaptically driven simulations confirmed and extended these analyses by showing that the electrotonic mechanisms of dendritic constancy are able to normalise spike numbers in cells with different dendritic sizes and shapes without disrupting the active burst generating mechanisms. It is tempting to speculate that dendritic constancy could support homogeneous spike-rate coding across different morphologies while at the same time allowing for cell-type specific spike-time coding. In other words, dendritic constancy may facilitate neuronal computations by maintaining stable firing rates while keeping variability of spike patterns (Denève and Machens, 2016; Denève et al., 2017; Gjorgjieva et al., 2016).

## Clinical relevance of dendritic constancy

The dendritic constancy principle could be of clinical relevance. Changes in dendritic size and shape are hallmarks of many neurological disorders, including chronic stress (Conrad et al., 2017), stroke (Brown et al., 2010; Qin et al., 2014) and neurodegeneration (Šišková et al., 2014; Spires and Hyman, 2004). Whereas dendritic atrophy caused by direct damage to a neuron is considered part of the disease process (Šišková et al., 2014), dendritic remodelling occurring in disconnected brain areas, i.e. network damage, is most likely homeostatic and restorative in nature. For example, the perforant pathway to the dentate gyrus degenerates in aged humans and in Alzheimer's disease (Leal and Yassa, 2013; Yassa et al., 2010). As a consequence, the target neurons of this pathway – dentate granule cells – retract their dendrites. This



dendritic retraction is caused by denervation and not by the disease itself (Einstein et al., 1994). Experimental animal data have shown that such denervated and retracted granule cells (Vuksic et al., 2011) eventually achieve synapse densities on their dendrites comparable to pre-denervation levels (Steward et al., 1988). In that case, the input conductance as well as the number of synapses with additional unit length would likely cancel each other out. The dendritic tree has fine-tuned itself to achieve firing rate homeostasis (Platschek et al., 2016, 2017). We show here that this feature is not specific to dentate granule cells and that synaptic excitability of neurons is size-invariant for all dendritic trees due to a general electrotonic principle. Thus, transneuronal dendritic remodelling appears to play a homeostatic role in maintaining information throughput in a partially damaged network.

## **Practical consequences for computational modelling and input-output computation of neurons**

**Equations 1 and 1'** allow for quantitative predictions of voltage responses to distributed synaptic inputs. This can be helpful for tuning large-scale morphologically realistic compartmental models (e.g. Markram et al., 2015) because by setting synaptic conductances to a specific value, it is possible to achieve a target voltage (and corresponding spike numbers from **Equation 2**). Thus, dendritic constancy simplifies the estimation of a neuron's behaviour within a network. For instance, for a given synaptic conductance, the frequency of synaptic activation required to reach a particular membrane voltage can be computed. From the perspective of network computations, the principle of dendritic constancy can be viewed as a mechanism for preserving stable neuronal activity in the circuit (as done in **Figure 7**). Intuitively, adding new synapses to a spiking network model would create more spikes. Even one additional spike can dramatically alter network dynamics (London et al., 2010). However, dendritic constancy is one possible mechanism to prevent this from happening, because the cell's number of output spikes depends on the relative number of active synapses and not on their absolute number. This means that increasing the number of synapses while adjusting the morphology accordingly would effectively not change the total number of spikes in the network.

In summary, our principle of dendritic constancy serves as an equalising homeostatic mechanism on which dendritic non-linearities and synaptic plasticity can operate (London and Häusser, 2005; Turrigiano, 2017). It creates a passive backbone for the conservation of excitabil-

ity converting a neuron to a reliable size- and synapse number-independent “summing point” 397  
within the network (Segev and London, 2000) but at the same time, it allows for more complex 398  
computations with active dendrites (Schmidt-Hieber and Nolan, 2017). Because dendritic con- 399  
stancy is based on basic electrotonic properties, it applies to all neurons receiving distributed 400  
excitatory or inhibitory inputs. This simple and universal principle has previously been over- 401  
looked because most studies focused on neuronal firing activated by somatic current injections 402  
or by few synaptic inputs instead of distributed synaptic stimulation. Dendritic constancy 403  
becomes apparent after leaving the “somatocentric” and embracing the “synaptocentric” view 404  
of a neuron’s input-output transformation. 405

## Acknowledgments 406

We would like to thank S. Jagannath, S. Platschek and S. Rozada for performing preliminary 407  
analyses and A. Castro, F. Effenberger and M. Schölvinc for useful discussions and comments 408  
on the manuscript. The work was supported by BMBF (01GQ1406 – Bernstein Award 2013 409  
to H.C.; OGEAM 031L0109B to T.D.), Deutsche Forschungsgemeinschaft (CRC 1080 to T.D.), 410  
University Medical Center Giessen and Marburg (UKGM; to P.J.), LOEWE CePTER – Center 411  
for Personalized Translational Epilepsy Research (to P.J. and T.D.) and F.Z.H. was supported 412  
by the International Max Planck Research School (IMPRS) for Neural Circuits in Frankfurt. 413  
The authors declare to have no competing financial interests. 414

## Author contributions 415

H.C., A.D.B, M.B, M.S., L.M., F.Z.H., T.D. and P.J. conceived the study and wrote the paper. 416  
H.C., M.B., M.S., L.M. and F.Z.H. performed the numerical simulations and A.D.B. performed 417  
the analytical calculations. 418

## Materials and methods 419

### Data and algorithm availability 420

All passive electrotonic and leaky integrate-and-fire (LIF) simulations were done in Matlab 421  
(Mathworks Inc, 2015b, 2017b and 2018b) using our own open-source software package, 422

the TREES toolbox (Cuntz et al., 2010) ([www.treestoolbox.org](http://www.treestoolbox.org), Interim version). TREES 423  
toolbox functions are marked in italic and end with a *\_tree* suffix throughout the Methods 424  
section. Active compartmental model simulations were done in NEURON (Carnevale and 425  
Hines, 2004) using our new software T2N to communicate with the TREES toolbox in Matlab 426  
(Beining et al., 2017). All results were further analysed in Matlab. All dendritic morphologies 427  
were downloaded from [www.NeuroMorpho.Org](http://www.NeuroMorpho.Org) (Ascoli, 2006) in July 2016. The active model 428  
for the spiking mechanism by Mainen and Sejnowski (1996) for **Figure 5** used model #2488 429  
from ModelDB (Hines et al., 2004). The LIF and adaptive exponential leaky integrate-and-fire 430  
(AdExpLIF) models (Brette and Gerstner, 2005) using realistic dendritic leak in **Figures 7 and 8** 431  
were implemented in Matlab. All new functions (*cgin\_tree*, *LIF\_tree*, *LIF\_FR\_tree*, 432  
*AdExpLIF\_tree*) will be made available as part of the TREES toolbox on publication at [www.](http://www.treestoolbox.org) 433  
[treestoolbox.org](http://www.treestoolbox.org) via Github. The code and data for all figures will be made available at 434  
<https://zenodo.org/> on publication. The code was tested on various operating systems. 435  
Individual methods are detailed in the following but can best be appreciated in the actual 436  
Matlab scripts. 437

## Cable equation for responses to distributed inputs. 438

The voltage response at distance  $x$  along a closed cable of length  $l$  due to current of magnitude 439  
 $I_{app}$  injected at the root (Rall, 1959, 1962) is 440

$$v(x) = v_0 \left[ \frac{\cosh\left(\frac{l-x}{\lambda}\right)}{\cosh\left(\frac{l}{\lambda}\right)} \right], \quad (3)$$

where  $\lambda$  is the electrotonic length constant and  $v_0$  is the voltage at the root: 441

$$v_0 = \frac{\coth\left(\frac{l}{\lambda}\right)}{G_\infty} I_{app}. \quad (4)$$

As transfer resistance is symmetric in dendrites (Koch and Segev, 1999; Rall et al., 1967; 442  
Rushton, 1937) this also gives the voltage  $v_x(0)$  at the root due to current injection at a distance 443  
 $x$  444

$$v_x(0) = \frac{I_{app}}{G_\infty} \left[ \frac{\cosh\left(\frac{l-x}{\lambda}\right)}{\sinh\left(\frac{l}{\lambda}\right)} \right]. \quad (5)$$

To find the total voltage  $V$  for currents injected along the entire cylinder, we require the 445

integral over all synaptic sites

446

$$V = \frac{I_{app}}{G_{\infty} \sinh\left(\frac{l}{\lambda}\right)} \int_0^l \cosh\left(\frac{l-x}{\lambda}\right) dx. \quad (6)$$

$$V = \frac{\lambda I_{app}}{G_{\infty}} = \frac{I_{app}}{G_m \pi d}. \quad (7)$$

## Morphologies for passive electrotonic simulations.

447

Simple cables (12.5 $\mu\text{m}$ —12.5 $\text{mm}$  length in 12.5 $\mu\text{m}$  steps) of constant 1 $\mu\text{m}$  diameter (**Figures 1B–D**) or various dendritic morphologies (**Figures 2–4**) were resampled to constant 1 $\mu\text{m}$  internode resolution (using *resample\_tree*). Individual datasets used in combination with specific membrane properties were from blowfly Lobula Plate tangential cells (TCs,  $n = 55$ ) (Cuntz et al., 2008) (**Figures 2A and 3A**,  $G_m = 500 \frac{\mu\text{S}}{\text{cm}^2}$ ), rat (Rihn and Claiborne, 1990) ( $n = 43$ ) and mouse (Schmidt-Hieber et al., 2007) ( $n = 8$ ) dentate gyrus granule cells (GCs, **Figures 2B and 3B**,  $G_m = 26.3 \frac{\mu\text{S}}{\text{cm}^2}$ ) and monkey cortical pyramidal cells (Luebke et al., 2015; Coskren et al., 2015) (PCs,  $n = 69$ , **Figures 2C and 3C**,  $G_m = 38 \frac{\mu\text{S}}{\text{cm}^2}$ ). The three datasets were also used in the context of leaky integrate-and-fire (LIF) spiking models in **Figures 7**. Dendrite morphologies from the entire NeuroMorpho.Org database were used for **Figures 4 and 8** by manual curation of all existing archives to select those with sufficient diameter profiles, sufficient depth information in  $z$ , sufficiently high-quality reconstructions and no sudden jumps in  $z$  (selection, 223 datasets, 9,841 reconstructions, see **Table S1**). The selected archives were sorted by cell types into the following categories in decreasing order of total cable length: Spinal cord motoneurons (red), hippocampal pyramidal cells (green), neocortical pyramidal cells (blue), retinal ganglion cells (pink), hippocampal granule cells (cyan), nitrenergic neurons (orange), *C. elegans* neurons (yellow), and other (different shades of grey per dataset). These categories were chosen as representatives for the possible scales of dendrites rather than because they corresponded to consistent cell types. All dendrite morphologies were normalised to a given average diameter (to the average diameters in their specific archives for **Figures 2 and 7** and to 1 $\mu\text{m}$  for **Figures 4 and 8**).

## Passive steady-state measures for dendritic morphologies.

469

The collapsed input conductance was measured by summing up the leak conductance over the entire membrane surface of the dendrite using the function *surf\_tree*. The resulting

470  
471

calculation is made available in the new TREES toolbox function *cgin\_tree*. Remaining 472  
electrotonic features are all readily available from the electrotonic signature (*sse\_tree*) as 473  
introduced previously (Cuntz et al., 2010). Briefly, all membrane and axial conductances are 474  
arranged according to the tree's adjacency matrix and the current transfer between all nodes is 475  
obtained by taking the inverse of the resulting conductance matrix. Local input resistances are 476  
then found on the diagonal of this electrotonic signature since current there is injected in the 477  
same node as the voltage is measured. Voltage responses to distributed inputs are simply the 478  
sum over the column or row of the electrotonic signature since the matrix is symmetric and 479  
the system is linear. While this method simulates steady-state distributed current injections, 480  
synaptic conductances associated with batteries according to their specific reversal potentials 481  
can be simulated instead (using the *syn\_tree* function). The passive results were obtained in 482  
their purest form in dendrites without the associated somata and axons. Only for **Figures S3** 483  
was the effect of somata explored in detail (see below). 484

### **Passive dynamic responses to distributed synaptic conductances.** 485

Synaptic inputs were simulated as a Poisson process inducing synaptic conductances at a 486  
given frequency per synapse. The dynamics of the conductance trace was given by the 487  
form  $G_{syn} = G_{scale} \left( e^{-\frac{t}{\tau_1}} - e^{-\frac{t}{\tau_2}} \right)$  with a rise time constant of  $\tau_2 = 0.5ms$  and a decay time 488  
constant of  $\tau_1 = 2.5ms$ .  $G_{scale}$  was set using **Equation 1** to ensure that the integral over time 489  
of the synaptic conductance profile produced the same voltage as the steady state cases 490  
(compare **Figure 2** rightmost panels with rightmost panels in **Figure 3**) at an input frequency 491  
of  $5Hz$  per synapse. Our novel TREES toolbox function *LIF\_tree* was used without a 492  
voltage threshold for spiking in the case of the passive dynamic responses. *LIF\_tree* injects 493  
distributed synapses into the conductance matrix that defines the dendritic tree in a time- 494  
resolved dynamic manner and produces local voltage responses throughout the dendrite. In 495  
**Figures 3 and 4** the voltage time courses at the dendritic root were plotted for a subset of 496  
morphologies (the ones shown in **Figure 3** and the first morphology in each of the 223 datasets 497  
in **Figure 4**) for better clarity. 498

### **Effect of soma size on dendritic constancy — analytical treatment.** 499

Consider an electrotonically compact soma of radius  $R$  attached to a dendritic cable of length  $l$  500  
and radius  $r$ . The intrinsic properties are given by the specific conductance of the intracellular 501

medium  $G_i$  and membrane conductance  $G_m$ . The soma has a leak conductance of  $G_s(R) = 4\pi R^2 G_m$ . The voltage along the cable due to a current injection of magnitude  $I_{app}$  at the soma is given by

$$v(x) = \left[ \frac{I_{app}}{G_\infty (1 + G_s(R) \tanh(\frac{l}{\lambda}))} \right] \frac{\cosh(\frac{l-x}{\lambda})}{\cosh(\frac{l}{\lambda})} \quad (8)$$

for  $\lambda = \sqrt{\frac{G_i d}{4G_m}}$ , the electrotonic length constant of the cable, and  $G_\infty = \frac{\pi G_i d^2}{4\lambda}$ , the semi-infinite conductance. Note that this derivation relies on a self-consistent description of the root voltage  $v_0$  due to the current flowing into the dendrite. Due to the symmetry of transfer resistance, this is also the voltage induced at the soma by current injection at a site  $x$ . Consider the total somatic response  $V_{Tot}$  to distributed synaptic currents:

$$V_{Tot} = \int_0^l v(x) dx;$$

$$V_{Tot} = \int_0^l \left[ \frac{I_{app}}{G_\infty (1 + G_s(R) \tanh(\frac{l}{\lambda}))} \right] \frac{\cosh(\frac{l-x}{\lambda})}{\cosh(\frac{l}{\lambda})} dx;$$

$$V_{Tot} = \frac{I_{app}}{\pi d G_m} \left[ \frac{\tanh(\frac{l}{\lambda})}{G_s(R) + \tanh(\frac{l}{\lambda})} \right]. \quad (9)$$

It can be seen that the term in brackets determines the deviation from dendritic constancy. A small value of  $G_s(R)$  is key as  $\tanh$  is bounded by one. **Figures S3** plots the relationship between somatic radius  $R$  and dendritic constancy for different electrotonic lengths  $\frac{l}{\lambda}$  and the relationship between the electrotonic length  $\frac{l}{\lambda}$  and dendritic constancy for somatic radii  $R$ .

## Spiking model by Mainen and Sejnowski.

We used our new tool T2N (Beining et al., 2017) to port the existing model for the spiking mechanism by Mainen and Sejnowski (1996) #2488 from ModelDB (Hines et al., 2004) to our TREES toolbox package in Matlab. In T2N, calculating spike frequency vs. current injections or vs. synaptic input frequencies using different dendritic morphologies becomes easy to implement. The required simulations are distributed automatically on the available computing cores and the entire toolset from the TREES toolbox becomes available to better edit and analyse dendritic trees and the resulting simulation variables. The code is available but, briefly, the simulations ran 40sec with a time step of 0.05ms and a pre-run for 200ms.

The initial voltage was set to  $-70mV$ , which was a close match for resting voltages for the 523  
four different morphologies. The voltage was calculated every  $50\mu m$  and a current injection 524  
electrode was inserted into the root or synapse point processes into every node (separated 525  
by  $1\mu m$ ). Morphologies from the original model were translated into TREES toolbox and 526  
resampled to  $1\mu m$  internode distances. The dendritic diameters were normalised to  $1\mu m$  and 527  
soma with axon divided into axon hillock, initial segment, nodes of Ranvier and myelinated 528  
segments were added as in the original model with the respective ion channel conductances. 529  
Implicit spines were modelled according to the original model for the current injections 530  
but even the L3 aspiny cell was implemented as spiny in all cases for better comparison. 531  
Responses to distributed synaptic inputs were modelled with *Exp2Syn* point processes with 532  
rise time constant of  $\tau_2 = 0.2ms$  and decay time constant of  $\tau_1 = 2.5ms$  driven by *NetStim* 533  
point processes in artificial point neurons under Poisson process conditions (noise 1) and 534  
following a given input frequency. The random seeds for the *NetStim* process were set to be 535  
independent for different synapses. 536

## CA1 pyramidal cell spiking models. 537

Electrotonic compartmentalisation and location dependent ion channel distributions allow for 538  
separate non-linear integration of inputs in different regions of dendrites. In order to check 539  
how these conditions affect our results, we studied two models of CA1 pyramidal cells that 540  
are known to produce dendritic spikes. The dendritic arborisation of pyramidal cells follows 541  
a laminar structure that generally reflects the different main excitatory afferents impinging 542  
on their dendrites from different brain regions. This distinctive structural organisation is 543  
also manifested in the way the electrotonic properties and active channels are distributed. 544  
Therefore, it was necessary to define how non-uniform channel distributions scale in the 545  
different morphologies. 546

## Jarsky et al. 2005 model. 547

We ported the model by Jarsky et al. (2005) to T2N in a similar manner as with the model by 548  
Mainen and Sejnowski. This model includes four active conductances: a voltage-gated  $Na^+$  549  
conductance, a delayed rectifier  $K^+$  conductance, a proximal A-type  $K^+$  conductance, and a 550  
distal A-type  $K^+$  conductance with a higher half-inactivation voltage. These conductances 551  
were distributed as a function of path distance from the soma. The  $Na^+$  and the delayed 552

rectifier  $K^+$  conductance were modelled following a uniform distribution, the weak excitability 553  
version of the model by Jarsky. The A-type  $K^+$  current was modelled with the experimentally 554  
reported six-fold increase in conductance along the apical dendrites resulting in variable 555  
slopes of the linear increase between soma and tuft in different morphologies. The apical 556  
dendrites were divided with borders along the apical trunk to contain 3.14% (proximal apical), 557  
36.27% (medial apical), 68.90% (distal) and 100% (tuft) of the total apical length respectively. 558  
These divisions occurred at path distances of around  $100\mu m$ ,  $300\mu m$  and  $500\mu m$ . 559

### **Poirazi et al. 2003 model.**

 560

The model by Poirazi et al. (2003b) was also ported to T2N, and similarly adapted to apply 561  
to different pyramidal cell morphologies. The model consists of a wide variety of active and 562  
passive membrane mechanisms (see the online supplement in Poirazi et al., 2003b), including 563  
17 types of ion channels, most of them non-uniformly distributed along the somato-dendritic 564  
axis. The apical trunk stems were divided according to laminar depth from soma to stratum 565  
lacunosum-moleculare ( $> 68.90\%$  from the total apical dendrite length, similarly as in the 566  
model by Jarsky) and the ion channel distributions were rescaled accordingly. The apical 567  
trunk dendrites that bifurcate within the stratum radiatum giving rise to two or more main 568  
apical dendrites were also considered as the apical trunk region. Similarly to the original 569  
Poirazi model, a peritrunk region was defined as the first  $50\mu m$  in path length from every 570  
oblique branch that extended away from the apical trunk. The remaining apical branches 571  
were considered as the apical region with a further distinction of more distal dendrites, 572  
located beyond a laminar depth away from the soma of  $300\mu m$  (distal apical) and  $350\mu m$  (tuft). 573  
The passive parameters and channel densities were similar to the Poirazi model, except for 574  
axial conductances being distributed uniformly and the leak reversal potential being fixed to 575  
 $-70mV$  rendering slightly different resting potentials for each cell morphology. 576

### **Integrate-and-fire spiking model with passive dendrite leak.**

 577

Dynamic LIF spiking responses for all morphologies in **Figures 2–4** were obtained using the 578  
*LIF\_tree* function in a similar way as for passive dynamic responses (see above). In the case 579  
of the LIF responses, synaptic conductances were set using **Equation 1'** to reach  $-60mV$  at 580  
the dendrite root when activated at  $1Hz$ . By then setting the voltage threshold of the LIF 581  
mechanism in the dendrite root to  $-60mV$  we ensured that spiking started around  $1Hz$  input 582



frequency (**Figure 7B**). Spikes were generated throughout the dendrite when the threshold was reached at the dendritic root, resetting the voltage everywhere to  $-70mV$ . Morphologies from NeuroMorpho.Org were used in their pure dendritic form (without soma or axon) and after normalising dendritic diameters for each population.

## Adaptive exponential integrate-and-fire spiking model with passive dendrite leak.

Since the simple LIF is generally not able to reproduce the variety of temporal firing patterns that occur in real neurons we extended it by an adaptation current in combination with an exponential activation term (Brette and Gerstner, 2005), while preserving passive parameters. This also allowed us to test yet another spiking mechanism for our theory of dendritic constancy. Instead of a fixed threshold for spike initiation, action potentials in the adaptive exponential leaky integrate-and-fire (AdExpLIF) are generated through a positive, exponential feedback in the voltage of the dendritic root  $V_{root}$ , given by the differential equation  $\frac{dV_{root}}{dt} = \Delta_T \cdot e^{\left(\frac{V_{root}-V_T}{\Delta_T}\right)}$ . By setting the slope factor to  $\Delta_T = 2mV$  and the threshold to  $V_T = -60mV$  we made sure that spiking started around  $1Hz$  input frequency similar to our LIF simulations. The exponential activation term in the soma makes precise processing of fast fluctuating inputs during synaptic bombardment possible (Fourcaud-Trocmé et al., 2003), as spike initiation is not instantaneous in contrast to the LIF. The upswing of the potential beyond  $-60mV$  grows rapidly to infinity, which is why the exact numerical threshold for a voltage reset has almost no influence on spike timing and was set to  $V_{thres} = 10mV$  in all simulations. Altering the parameters of spike initiation had no effects on the constancy of spike numbers with respect to morphology ( $> 50mV$ ). The adaptation current  $w$  acted as a negative feedback on the voltage in each segment of the dendritic tree and was given by:

$$\tau \frac{dw}{dt} = a(w - E_L) - w. \quad (10)$$

Once the dendritic root reached  $V_{thres}$ , the voltage in each node was reset to  $V_{reset} = -70mV$  in the case of spike frequency adaptation. Increasing the reset voltage to  $-60mV$  induced bursting. After a spike was triggered, the variable  $w$  was increased by an amount  $b$  in all segments, which was  $b = -60fA$  in the adaptation and bursting neuron model. Depending on  $b$ , the bursting neuron elicited several spikes in a short period of time until  $w$  counterbalanced the exponential activation term, resulting in a longer ISI in between bursts. In case of the

bursting model, the time constant was set to  $30ms$ . Increasing the time constant to  $\tau = 100ms$  in combination with a high value of  $b$  resulted in spike frequency adaptation.

### Stochastic inputs: Subthreshold voltage moments.

Consider a sealed dendrite of physical length  $l$  with electrotonic length constant  $\lambda$ . The voltage time course at the proximal end due to a single brief injection of current of magnitude  $a$  at electrotonic position  $0 \leq x \leq l$  is given by

$$\varepsilon(x, t) = \frac{a\lambda e^{-\frac{t}{\tau}}}{l} \left[ \frac{1}{2} + \sum_{n=1}^{\infty} \cos\left(\frac{n\pi x}{l}\right) e^{-\left(\frac{n\pi\lambda}{l}\right)^2 \frac{t}{\tau}} \right]. \quad (11)$$

This is plotted in **Figure S6A** (dashed lines). Given that synapses are uniformly distributed over  $[0, l]$ , the expected (ensemble) value of  $\varepsilon$  at a given time  $t$ ,  $\langle \varepsilon(t) \rangle$ , is given by

$$\langle \varepsilon(t) \rangle = \int_0^L \varepsilon(x, t) P[x] dx = \frac{ae^{-\frac{t}{\tau}}}{2L} \quad (12)$$

where we have written  $L = \frac{l}{\lambda}$  for the electrotonic length. The voltage above rest at the soma, neglecting for the moment a threshold-rest mechanism, is given by a sum of independent synaptic inputs

$$v(t) = \sum_{\{x_i, t_i\}} \varepsilon(x_i, t - t_i) \chi_{[t_i, \infty)}(t) \quad (13)$$

where the times  $t_i$  are given by a Poisson process of rate  $r_\lambda l$ , the locations  $x_i$  are uniformly distributed along the dendrite, and  $\chi_{[t_i, \infty)}(t)$  is the indicator function of the interval  $[t_i, \infty)$ .

The subthreshold steady-state mean voltage above rest  $\langle v \rangle$  can be found by taking expectations

$$\langle v \rangle = r_\lambda L \int_0^\infty \frac{1}{L} \int_0^L \varepsilon(x, t) dx dt = \frac{ar_\lambda\tau}{2} \quad (14)$$

This is independent of  $L$ . Similarly, the subthreshold variance in  $v$  can be written as

$$Var(v) = r_\lambda L \int_0^\infty \frac{1}{L} \int_0^L \varepsilon^2(x, t) dx dt = \frac{a^2 r_\lambda \tau}{8} \coth(L) \quad (15)$$

where the  $\coth(L)$  term approaches 1 in the limit of large  $L$  (**Figure S6B**, dashed lines).

## Stochastic inputs: Subthreshold voltage moments for synaptic currents. 628

The above calculations give the voltage impulse response at the soma. If a synapse has its own time course  $\zeta(t)$  (with  $\zeta(t) = 0$  for  $t < 0$ ), then the somatic voltage above rest is given instead by 629  
630  
631

$$v(t) = \sum_{\{x_i, t_i\}} \zeta * \varepsilon(x_i, t - t_i) \chi_{[t_i, \infty)}(t) \quad (16)$$

where  $\zeta * \varepsilon(x, t) = \int_0^t \zeta(\theta) \varepsilon(x, t - \theta) d\theta$  represents convolution in time. A typical synaptic filter is modelled as a difference of exponentials with timescales  $\tau_f$  and  $\tau_s$  such that 632  
633

$$\zeta(t) = \frac{e^{-\frac{t}{\tau_f}} - e^{-\frac{t}{\tau_s}}}{\tau_f - \tau_s} \quad (17)$$

Note that each term in the series form of  $\varepsilon(x, t)$  can be written as  $c_n e^{-\frac{t}{\tau_n}}$  for some coefficient  $c_n$  and timescale  $\tau_n$  as defined above (with  $c_n$  typically dependent on input location  $x$ ). Then each such term convolves with  $\zeta(t)$  to give 634  
635  
636

$$\frac{c_n \tau_n}{\tau_s - \tau_f} \left( e^{-\frac{t}{\tau_n}} \left( \frac{\tau_f}{\tau_f - \tau_n} - \frac{\tau_s}{\tau_s - \tau_n} \right) - \left( \frac{\tau_f e^{-\frac{t}{\tau_f}}}{\tau_f - \tau_n} - \frac{\tau_s e^{-\frac{t}{\tau_s}}}{\tau_s - \tau_n} \right) \right) \quad (18)$$

if  $\tau_f, \tau_s \neq \tau_n$ . In the case that one of  $\tau_f = \tau_n$  or  $\tau_s = \tau_n$  (without loss of generality let  $\tau_f = \tau_n$ ) the form is instead 637  
638

$$\frac{c_n}{\tau_s - \tau_n} \left( \left( \frac{\tau_s \tau_n}{\tau_s - \tau_n} \right) \left( e^{-\frac{t}{\tau_n}} - e^{-\frac{t}{\tau_s}} \right) - t e^{-\frac{t}{\tau_n}} \right) \quad (19)$$

with an additional synaptic filter alongside the dendritic filter given by **Equation 11**, the difference in somatic voltage responses to proximal and distal inputs is reduced even for synapses that are fast compared to the membrane time constant (**Figure S6A**). 639  
640  
641

The subthreshold mean is unchanged from the instantaneous case as  $\int_0^\infty \zeta(\theta) d\theta = 1$ , and the subthreshold variance can be computed by squaring the above terms, integrating  $t$  from 0 to  $\infty$  and  $x$  from 0 to  $l$ , and summing the infinite series. The result is cumbersome to write in full, but can be plotted in **Figure S6B**. The variance is lower in the case of the synaptic filter compared to instantaneous current injection. 642  
643  
644  
645  
646

## Stochastic inputs: Subthreshold characteristic functions and firing rate approximation. 647 648

The firing rate can in principle be calculated exactly from the expected time for the stochastic process (Equation 13) to first reach the firing threshold  $v_{th}$  from the voltage reset  $v_{re}$ . Given a uniform initial voltage  $v_0$  (which decays with timescale  $\tau$ ), the random variable  $V_{\{T, v_0\}}$  describes the voltage  $T$  seconds later. The characteristic function  $\phi_v(s, T, v_0) = \mathbb{E} [e^{-sV_{\{T, v_0\}}}]$  of  $V_{\{T, v_0\}}$  is given by (Rice, 1944) 649  
650  
651  
652  
653

$$\phi_v(s, T, v_0) = \exp \left[ -rl \left( \int_0^T 1 - \mathbb{E}_x [e^{-s[\varepsilon(x,t)]}] dt \right) + v_0 e^{-\frac{T}{\tau}} \right] \quad (20)$$

where the expectation  $\mathbb{E}_x$  is over synaptic locations  $x$ . This can be inverted to give the probability distribution  $f_v$  of  $V_{\{T, v_0\}}$ . An additional integral transform over  $T$ ,  $\psi_v(\rho, v_0) = \mathbb{E} [e^{-\rho T} f_v]$ , allows the moment generating function  $M_{FP}(t)$  of the first-passage time density to be written as (Siegert, 1951) 654  
655  
656  
657

$$M_{FP}(t) = \frac{\psi_v(-\rho, v_{re})}{\psi_v(-\rho, v_{th})} \quad (21)$$

The mean first-passage time, and hence the output firing rate, could then be extracted from  $\frac{dM_{FP}}{dt} |_{t=0}$ . 658  
659

In practice, the above procedure is numerically sensitive and the following approximation is robust to the high cumulative input rates typically seen across an entire dendritic tree. Taking the subthreshold voltage mean  $\mu_v$  and standard deviation  $\sigma_v$  allows the firing rate  $R$  to be accurately approximated (Alijani and Richardson, 2011) using the equation from Brunel and Hakim (1999) 660  
661  
662  
663  
664

$$R^{-1} = \tau \int_0^\infty \frac{1}{z} e^{-\frac{z^2}{2}} (e^{zz_{th}} - e^{zz_{re}}) dz \quad (22)$$

where  $z_{th} = \frac{v_{th} - \mu_v}{\sigma_v}$  and  $z_{re} = \frac{v_{re} - \mu_v}{\sigma_v}$ . This is plotted as a function of dendrite length in Figure S6B and as a function of input firing rate in Figure S6C. 665  
666

Combining the above equations, the output firing rate  $R$  can be written, in the case of instantaneous synapses, in terms of intrinsic quantities as 667  
668

$$R^{-1} = \frac{C}{G_m} \int_0^\infty \frac{1}{z} e^{-\frac{z^2}{2}} \left[ e^{z \sqrt{\frac{2\lambda G_m}{r l C \coth \frac{l}{\lambda}}} \left( \frac{2\pi d G_m v_{th}}{I_{dist}} - \frac{r l C}{\lambda G_m} \right)} - e^{z \sqrt{\frac{2\lambda G_m}{r l C \coth \frac{l}{\lambda}}} \left( \frac{2\pi d G_m v_{re}}{I_{dist}} - \frac{r l C}{\lambda G_m} \right)} \right] dz \quad (23)$$

where, as before,  $C$  is the specific capacitance,  $G_m$  is the membrane conductivity,  $l$  is the dendrite length,  $d$  is the average diameter,  $\lambda = \sqrt{\frac{G_i d}{4G_m}}$  is the electrotonic length,  $G_i$  is the axial conductivity, and  $I_{dist}$  is the current induced by a single synapse. Additionally,  $r$  is the rate of synaptic activation per  $\mu m$ , and  $v_{re}$  and  $v_{th}$  are the reset and threshold voltages respectively.

In the case of filtered synapses, there is not a compact form for  $R$  and **Equation 22** is used directly with the subthreshold mean and variance as derived above. The code to calculate  $R$  analytically can be found in the function `LIF_FR_tree` for synaptically filtered current injections.

## References

- Adachi R, Yamada R, Kuba H (2015) Plasticity of the axonal trigger zone. *Neuroscientist* 21:255–265.
- Alijani AK, Richardson MJE (2011) Rate response of neurons subject to fast or frozen noise: From stochastic and homogeneous to deterministic and heterogeneous populations. *Physical Review E* 84:011919.
- Ascoli GA (2006) Mobilizing the base of neuroscience data: the case of neuronal morphologies. *Nature Reviews Neuroscience* 7:318–324.
- Bakken TE, Stevens CF (2011) Visual system scaling in teleost fish. *Journal of Comparative Neurology* 153:142–153.
- Beining M, Mongiat LA, Schwarzacher SW, Cuntz H, Jedlicka P (2017) T2N as a new tool for robust electrophysiological modeling demonstrated for mature and adult-born dentate granule cells. *eLife* 6:e26517.
- Bekkers JM, Stevens CF (1990) Two different ways evolution makes neurons larger. *Progress in Brain Research* 83:37–45.

- Bird AD, Cuntz H (2016) Optimal current transfer in dendrites. *PLOS Computational Biology* 12:e1004897. 692  
693
- Borst A, Haag J (1996) The intrinsic electrophysiological characteristics of fly lobula plate tangential cells: I. Passive membrane properties. *Journal of Computational Neuroscience* 3:313–336. 694  
695
- Branco T, Clark BA, Häusser M (2010) Dendritic discrimination of temporal input sequences in cortical neurons. *Science* 329:1671–1675. 696  
697
- Brette R, Gerstner W (2005) Adaptive exponential integrate-and-fire model as an effective description of neuronal activity. *Journal of Neurophysiology* 94:3637–3642. 698  
699
- Brown CE, Boyd JD, Murphy TH (2010) Longitudinal in vivo imaging reveals balanced and branch-specific remodeling of mature cortical pyramidal dendritic arbors after stroke. *Journal of Cerebral Blood Flow and Metabolism* 30:783–791. 700  
701  
702
- Brunel N, Hakim V (1999) Fast global oscillations in networks of integrate-and-fire neurons with low firing rates. *Neural Computation* 11:1621–1671. 703  
704
- Carnevale NT, Hines ML (2004) *The NEURON Book*. Cambridge University Press. 705
- Chavlis S, Petrantonakis PC, Poirazi P (2017) Dendrites of dentate gyrus granule cells contribute to pattern separation by controlling sparsity. *Hippocampus* 27:89–110. 706  
707
- Chen X, Yuan LL, Zhao C, Birnbaum SG, Frick A, Jung WE, Schwarz TL, Sweatt JD, Johnston D (2006) Deletion of Kv4.2 gene eliminates dendritic A-type K<sup>+</sup> current and enhances induction of long-term potentiation in hippocampal CA1 pyramidal neurons. *Journal of Neuroscience* 26:12143–12151. 708  
709  
710  
711
- Connelly WM, Crunelli V, Errington AC (2016) Passive synaptic normalization and input synchrony-dependent amplification of cortical feedback in thalamocortical neuron dendrites. *Journal of Neuroscience* 36:3735–3754. 712  
713  
714
- Conrad CD, Ortiz JB, Judd JM (2017) Chronic stress and hippocampal dendritic complexity: Methodological and functional considerations. *Physiology & Behavior* 178:66–81. 715  
716
- Coskren PJ, Luebke JI, Kabaso D, Wearne SL, Yadav A, Rumbell T, Hof PR, Weaver CM (2015) Functional consequences of age-related morphologic changes to pyramidal neurons of the rhesus monkey prefrontal cortex. *Journal of Computational Neuroscience* 38:263–283. 717  
718  
719

- Cuntz H, Forstner F, Borst A, Häusser M (2010) One rule to grow them all: a general theory of neuronal branching and its practical application. *PLoS Computational Biology* 6:e1000877. 720-721
- Cuntz H, Forstner F, Haag J, Borst A (2008) The morphological identity of insect dendrites. *PLoS Computational Biology* 4:e1000251. 722-723
- Cuntz H, Forstner F, Schnell B, Ammer G, Raghu SV, Borst A (2013) Preserving neural function under extreme scaling. *PLoS ONE* 8:e71540. 724-725
- Cuntz H, Haag J, Borst A (2003) Neural image processing by dendritic networks. *PNAS* 100:11082–11085. 726-727
- Cuntz H, Haag J, Forstner F, Segev I, Borst A (2007) Robust coding of flow-field parameters by axo-axonal gap junctions between fly visual interneurons. *PNAS* 104:10229–10233. 728-729
- Cuntz H, Mathy A, Häusser M (2012) A scaling law derived from optimal dendritic wiring. *PNAS* 109:11014–11018. 730-731
- Denève S, Alemi A, Bourdoukan R (2017) The brain as an efficient and robust adaptive learner. *Neuron* 94:969–977. 732-733
- Denève S, Machens CK (2016) Efficient codes and balanced networks. *Nature Neuroscience* 19:375–382. 734-735
- Einstein G, Buranosky R, Crain BJ (1994) Dendritic pathology of granule cells in Alzheimer’s disease is unrelated to neuritic plaques. *Journal of Neuroscience* 14:5077–5088. 736-737
- Evans MD, Dumitrescu AS, Kruijssen DL, Taylor SE, Grubb MS (2015) Rapid modulation of axon initial segment length influences repetitive spike firing. *Cell Reports* 13:1233–1245. 738-739
- Fourcaud-Trocmé N, Hansel D, van Vreeswijk C, Brunel N (2003) How spike generation mechanisms determine the neuronal response to fluctuating inputs. *Journal of Neuroscience* 23:11628–11640. 740-742
- Gabbiani F, Krapp HG, Koch C, Laurent G (2002) Multiplicative computation in a visual neuron sensitive to looming. *Nature* 420:320–324. 743-744
- Garden DLF, Dodson PD, O’Donnell C, White MD, Nolan MF (2008) Tuning of Synaptic Integration in the Medial Entorhinal Cortex to the Organization of Grid Cell Firing Fields. *Neuron* 60:875–889. 745-747

- Gidon A, Segev I (2012) Principles governing the operation of synaptic inhibition in dendrites. *Neuron* 75:330–341. 748  
749
- Gjorgjieva J, Drion G, Marder E (2016) Computational implications of biophysical diversity and multiple timescales in neurons and synapses for circuit performance. *Current Opinion in Neurobiology* 37:44–52. 750  
751  
752
- Gulledge AT, Bravo JJ (2016) Neuron morphology influences axon initial segment plasticity. *eneuro* 3:ENEURO.0085–15.2016. 753  
754
- Häusser M (2001) Synaptic function: dendritic democracy. *Current Biology* 11:R10–12. 755
- Hines ML, Morse T, Migliore M, Carnevale NT, Shepherd GM (2004) ModelDB: A database to support computational neuroscience. *Journal of Computational Neuroscience* 17:7–11. 756  
757
- Jaffe DB, Carnevale NT (1999) Passive normalization of synaptic integration influenced by dendritic architecture. *Journal of Neurophysiology* 82:3268–3285. 758  
759
- Jarsky T, Roxin A, Kath WL, Spruston N (2005) Conditional dendritic spike propagation following distal synaptic activation of hippocampal CA1 pyramidal neurons. *Nature Neuroscience* 8:1667–1676. 760  
761  
762
- Koch C, Douglas RJ, Wehmeier U (1990) Visibility of synaptically induced conductance changes: theory and simulations of anatomically characterized cortical pyramidal cells. *Journal of Neuroscience* 10:1728–1744. 763  
764  
765
- Koch C, Segev I (1999) *Methods in neuronal modeling - from ions to networks* MIT Press, Cambridge, MA. 766  
767
- Kuba H (2012) Structural tuning and plasticity of the axon initial segment in auditory neurons. *Journal of Physiology* 590:5571–5579. 768  
769
- Kuba H, Oichi Y, Ohmori H (2010) Presynaptic activity regulates Na<sup>+</sup> channel distribution at the axon initial segment. *Nature* 465:1075–1078. 770  
771
- Leal SL, Yassa MA (2013) Perturbations of neural circuitry in aging, mild cognitive impairment, and Alzheimer’s disease. *Ageing Research Reviews* 12:823–831. 772  
773
- London M, Häusser M (2005) Dendritic computation. *Annual Review of Neuroscience* 28:503–532. 774



- London M, Meunier C, Segev I (1999) Signal transfer in passive dendrites with nonuniform membrane conductance. *Journal of Neuroscience* 19:8219–8233. 775  
776
- London M, Roth A, Beeren L, Häusser M, Latham PE (2010) Sensitivity to perturbations in vivo implies high noise and suggests rate coding in cortex. *Nature* 466:123–127. 777  
778
- London M, Segev I (2001) Synaptic scaling in vitro and in vivo. *Nature Neuroscience* 4:853–855. 779
- Luebke JI, Medalla M, Amatrudo JM, Weaver CM, Crimins JL, Hunt B, Hof PR, Peters A (2015) Age-related changes to layer 3 pyramidal cells in the rhesus monkey visual cortex. *Cerebral Cortex* 25:1454–1468. 780  
781  
782
- Magee (1999) Dendritic I<sub>h</sub> normalizes temporal summation in hippocampal CA1 neurons. *Nature Neuroscience* 2:508–514. 783  
784
- Magee JC (2000) Dendritic integration of excitatory synaptic input. *Nature Reviews Neuroscience* 1:181–190. 785  
786
- Magee JC, Cook EP (2000) Somatic EPSP amplitude is independent of synapse location in hippocampal pyramidal neurons. *Nature Neuroscience* 3:895–903. 787  
788
- Mainen ZF, Joerges J, Huguenard JR, Sejnowski TJ (1995) A model of spike initiation in neocortical pyramidal neurons. *Neuron* 15:1427–1439. 789  
790
- Mainen ZF, Sejnowski TJ (1996) Influence of dendritic structure on firing pattern in model neocortical neurons. *Nature* 382:363–366. 791  
792
- Markram H, Muller E, Ramaswamy S, Reimann MW, Abdellah M, Sanchez CA, Ailamaki A, Alonso-Nanclares L, Antille N, Arsever S, Kahou GAA, Berger TK, Bilgili A, Buncic N, Chalimourda A, Chindemi G, Courcol JD, Delalondre F, Delattre V, Druckmann S, Dumusc R, Dynes J, Eilemann S, Gal E, Gevaert ME, Ghobril JP, Gidon A, Graham JW, Gupta A, Haenel V, Hay E, Heinis T, Hernando JB, Hines M, Kanari L, Keller D, Kenyon J, Khazen G, Kim Y, King JG, Kisvarday Z, Kumbhar P, Lasserre S, Le Bé JV, Magalhães BRC, Merchán-Pérez A, Meystre J, Morrice BR, Muller J, Muñoz-Céspedes A, Muralidhar S, Muthurasa K, Nachbaur D, Newton TH, Nolte M, Ovcharenko A, Palacios J, Pastor L, Perin R, Ranjan R, Riachi I, Rodríguez JR, Riquelme JL, Rössert C, Sfyarakis K, Shi Y, Shillcock JC, Silberberg G, Silva R, Tauheed F, Telefont M, Toledo-Rodriguez M, Tränkler T, Van Geit W, Díaz JV, Walker 793  
794  
795  
796  
797  
798  
799  
800  
801  
802

- R, Wang Y, Zaninetta SM, DeFelipe J, Hill SL, Segev I, Schürmann F (2015) Reconstruction and simulation of neocortical microcircuitry. *Cell* 163:456–492. 803  
804
- Mckay BE, Turner RW (2005) Physiological and morphological development of the rat cerebellar Purkinje cell. *Journal of Physiology* 567:829–850. 805  
806
- Platschek S, Cuntz H, Deller T, Jedlicka P (2017) Lesion-induced dendritic remodeling as a new mechanism of homeostatic structural plasticity in the adult brain In *The Rewiring Brain*, Vol. 15, pp. 203–218. Elsevier. 807  
808  
809
- Platschek S, Cuntz H, Vuksic M, Deller T, Jedlicka P (2016) A general homeostatic principle following lesion induced dendritic remodeling. *Acta Neuropathologica Communications* 4:19. 810  
811
- Poirazi P, Brannon T, Mel BW (2003a) Arithmetic of subthreshold synaptic summation in a model CA1 pyramidal cell. *Neuron* 37:977–987. 812  
813
- Poirazi P, Brannon T, Mel BW (2003b) Pyramidal neuron as two-layer neural network. *Neuron* 37:989–999. 814  
815
- Polsky A, Mel BW, Schiller J (2004) Computational subunits in thin dendrites of pyramidal cells. *Nature Neuroscience* 7:621–627. 816  
817
- Qin L, Jing D, Parauda S, Carmel J, Ratan RR, Lee FS, Cho S (2014) An adaptive role for BDNF Val66Met polymorphism in motor recovery in chronic stroke. *Journal of Neuroscience* 34:2493–2502. 818  
819  
820
- Rall W (1959) Branching dendritic trees and motoneuron membrane resistivity. *Experimental Neurology* 527:491–527. 821  
822
- Rall W (1962) Theory of physiological properties of dendrites. *Annals of the New York Academy of Sciences* 96:1071–1092. 823  
824
- Rall W, Burke RE, Smith TG, Nelson PG, Frank K (1967) Dendritic location of synapses and possible mechanisms for the monosynaptic EPSP in motoneurons. *Journal of Neurophysiology* 30:1169–1193. 825  
826  
827
- Rall W, Rinzel J (1973) Branch input resistance and steady attenuation for input to one branch of a dendritic neuron model. *Biophysical Journal* 13:648–687. 828  
829
- Rice SO (1944) Mathematical analysis of random noise. *Bell Systems* . 830

- Rihn LL, Claiborne BJ (1990) Dendritic growth and regression in rat dentate granule cells during late postnatal development. *Developmental Brain Research* 54:115–124. 831 832
- Rinzel J, Rall W (1974) Transient response in a dendritic neuron model for current injected at one branch. *Biophysical journal* 14:759–790. 833 834
- Rudolph M, Destexhe A (2003) A fast-conducting, stochastic integrative mode for neocortical neurons in vivo. *Journal of Neuroscience* 23:2466–2476. 835 836
- Rushton WAH (1937) Initiation of the propagated disturbance. *Proceedings of the Royal Society B* 124:210–243. 837 838
- Schmidt-Hieber C, Jonas P, Bischofberger J (2007) Subthreshold dendritic signal processing and coincidence detection in dentate gyrus granule cells. *Journal of Neuroscience* 27:8430–8441. 839 840
- Schmidt-Hieber C, Nolan MF (2017) Synaptic integrative mechanisms for spatial cognition. *Nature Neuroscience* 20:1483–1492. 841 842
- Segev I, London M (2000) Untangling dendrites with quantitative models. *Science* 290:744–750. 843
- Siegert AJF (1951) On the First Passage Time Probability Problem. *Physical Review* 81:617–623. 844
- Single S, Borst A (1998) Dendritic integration and its role in computing image velocity. *Science* 281:1848–1850. 845 846
- Šišková Z, Justus D, Kaneko H, Friedrichs D, Henneberg N, Beutel T, Pitsch J, Schoch S, Becker A, von der Kammer H, Remy S (2014) Dendritic structural degeneration is functionally linked to cellular hyperexcitability in a mouse model of Alzheimer’s disease. *Neuron* 84:1023–1033. 847 848 849 850
- Snider J, Pillai A, Stevens CF (2010) A universal property of axonal and dendritic arbors. *Neuron* 66:45–56. 851 852
- Spires TL, Hyman BT (2004) Neuronal structure is altered by amyloid plaques. *Reviews in the Neurosciences* 15:267–278. 853 854
- Stein RB (1965) A theoretical analysis of neuronal variability. *Biophysical Journal* 5:173–194. 855
- Steward O, Vinsant SL, Davis L (1988) The process of reinnervation in the dentate gyrus of adult rats: an ultrastructural study of changes in presynaptic terminals as a result of sprouting. *Journal of Comparative Neurology* 267:203–210. 856 857 858

- Teeter CM, Stevens CF (2011) A general principle of neural arbor branch density. *Current Biology* 21:2105–2108. 859  
860
- Turrigiano GG (2017) The dialectic of Hebb and homeostasis. *Philosophical transactions of the Royal Society of London. Series B, Biological sciences* 372:4–6. 861  
862
- Turrigiano GG, Nelson SB (2004) Homeostatic plasticity in the developing nervous system. *Nature Reviews Neuroscience* 5:97–107. 863  
864
- van Elburg RAJ, van Ooyen A (2010) Impact of dendritic size and dendritic topology on burst firing in pyramidal cells. *PLoS Computational Biology* 6:e1000781. 865  
866
- van Ooyen A, Duijnhouwer J, Remme MWH, van Pelt J (2002) The effect of dendritic topology on firing patterns in model neurons. *Network: Computation in Neural Systems* 13:311–325. 867  
868
- Vetter P, Roth A, Häusser M (2001) Propagation of action potentials in dendrites depends on dendritic morphology. *Journal of Neurophysiology* 85:926–937. 869  
870
- Vuksic M, Del Turco D, Vlachos A, Schuldt G, Müller CM, Schneider G, Deller T (2011) Unilateral entorhinal denervation leads to long-lasting dendritic alterations of mouse hippocampal granule cells. *Experimental Neurology* 230:176–185. 871  
872  
873
- Williams SR, Stuart GJ (2003) Role of dendritic synapse location in the control of action potential output. *Trends in Neurosciences* 26:147–154. 874  
875
- Yassa MA, Muftuler LT, Stark CEL (2010) Ultrahigh-resolution microstructural diffusion tensor imaging reveals perforant path degradation in aged humans in vivo. *PNAS* 107:12687–12691. 876  
877

## Supporting information

878

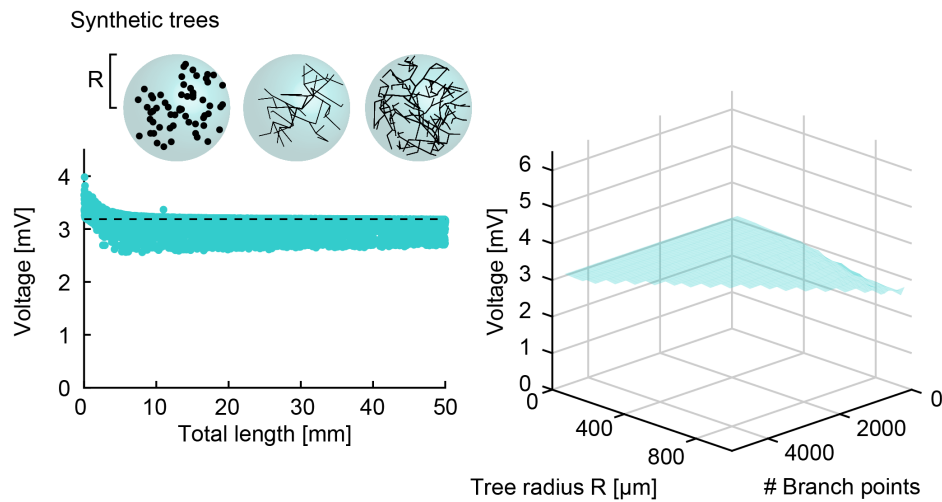

**Fig S1. Steady-state passive responses to distributed inputs in synthetic dendrites are independent of dendrite length and shape.**

Similar analysis as in **Figure 4** but for 10,000 synthetic dendritic trees obtained using extended minimum spanning trees that reproduce many features of real dendrites (Cuntz et al., 2010). These cover a wide range of tree complexities as well as overall sizes (see Methods).

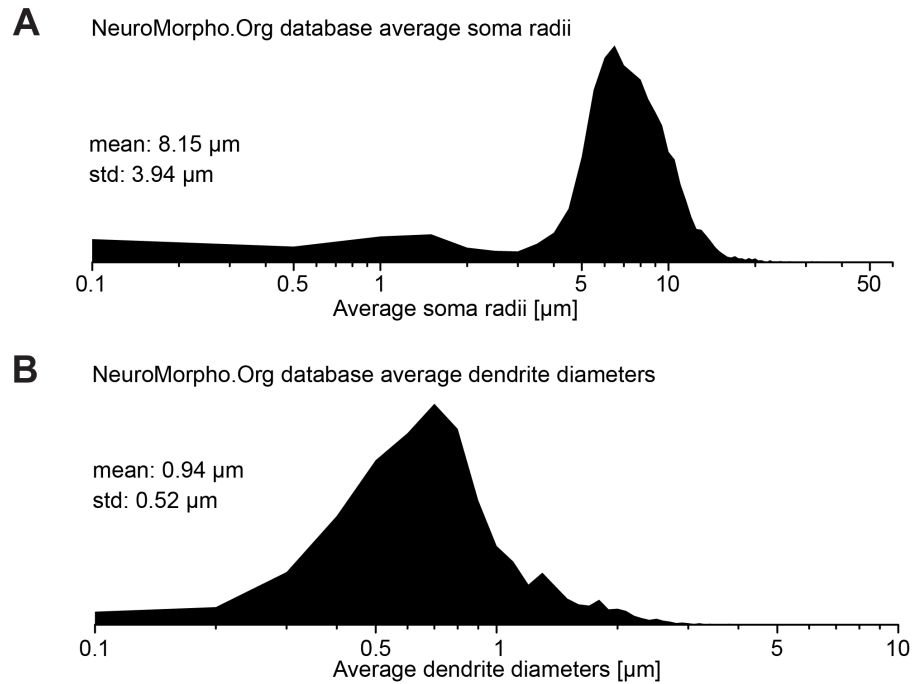

**Fig S2. Distributions of diameters in somata and dendrites of the NeuroMorpho.Org database.**

**A**, Distribution of soma radii in NeuroMorpho.Org. Not every cell had well-reconstructed somata explaining the tail of very small radii. High-quality soma reconstructions were not an inclusion criterion for this study that focuses on dendritic trees in the main text. **B**, Distribution of average dendrite diameters after resampling to  $1\mu\text{m}$  internode distances to weigh each location in the dendritic tree homogeneously.

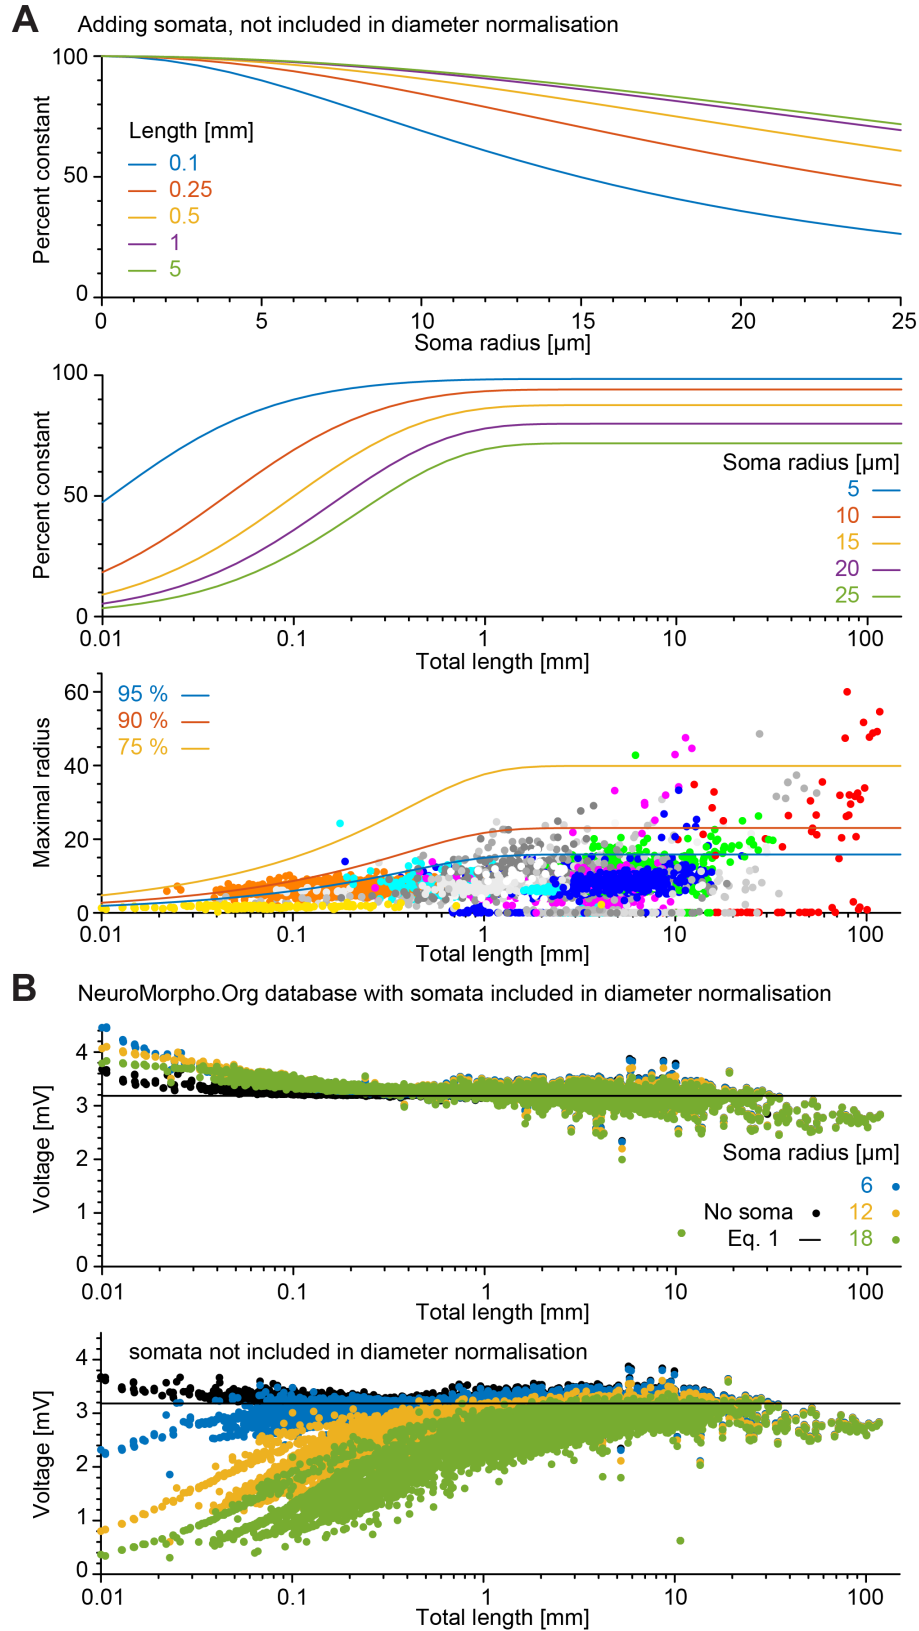

**Fig S3. Effect of soma size on dendritic constancy.**

See next page

**Fig S3. (continued) A**, Analytical calculations of relative deviation from dendritic constancy (compared to 100%) as a function of somatic radius for different lengths of dendrite (top panel) and as a function of length for different somatic radii (bottom panels). Used cables had  $1\mu m$  diameter, specific membrane conductance  $G_m = 50 \frac{\mu S}{cm^2}$  and specific axial resistance of  $Ri = 100\Omega cm$ . **B**, Similar calculation for the NeuroMorpho.Org database as **Figure 4A** but with appended somata that do not receive synaptic inputs (see Methods for more details). Here, colours indicate the radius of the appended soma.



Inhomogeneous synaptic weights

**A** Jarsky et al. model

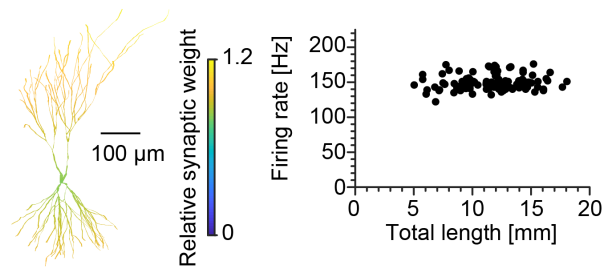

**B** LIF NeuroMorpho.Org dendrites

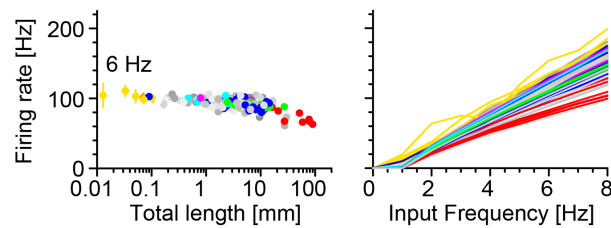

**Fig S4. Effect of inhomogeneous distance-dependent synapse weights on dendritic constancy.**

In these plots, synapses were scaled from  $0.8\times$  to  $1.2\times$  in a linear relation with distance (path length) from soma. **A**, Analogous to **Figure 6B**, the model by Jarsky et al. (2005) with inhomogeneous synapse weights. **B**, Analogous to **Figure 8A**, the LIF model in NeuroMorpho.Org morphologies with inhomogeneous synapse weights.

Distributed excitation (80 %) and inhibition (20 %)

**A** Jarsky et al. model

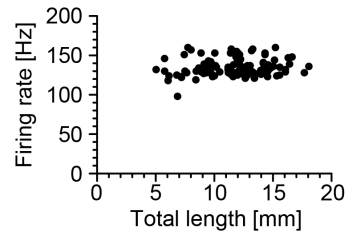

**B** LIF NeuroMorpho.Org dendrites

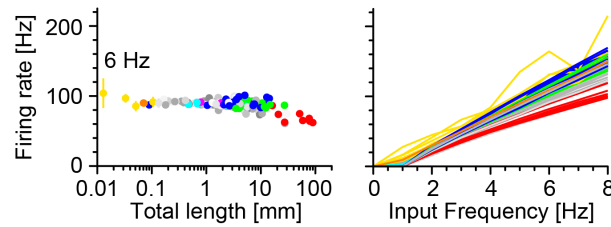

**Fig S5. Effect of inhibitory synapses on dendritic constancy.**

In these plots, 20% of all synapses were randomly selected to have a reversal potential of  $-80mV$ , which renders them inhibitory synapses. **A**, Analogous to **Figure 6B**, the model by Jarsky et al. (2005) with 20% inhibitory synapses. **B**, Analogous to **Figure 8A**, the LIF model in NeuroMorpho.Org morphologies with 20% inhibitory synapses.

Analytical calculations in the cable: Voltage to spike transformation

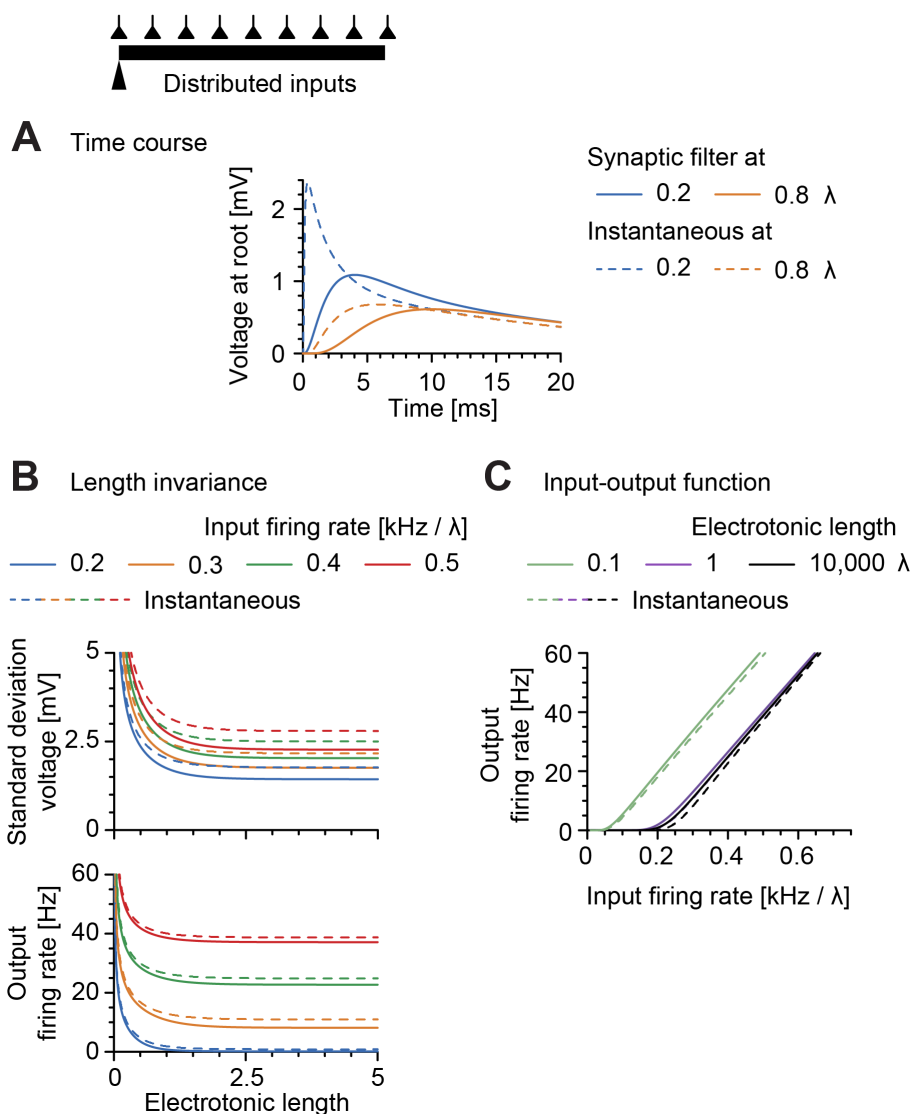

**Fig S6. Transformation of voltage fluctuations into spikes.**

**A**, Voltage response as a function of time at the proximal end of a sealed dendrite of electrotonic length 1 to an instantaneous (dashed lines) and synaptically filtered (double exponential  $\tau_{rise} = 0.5ms$ ,  $\tau_{decay} = 2.5ms$ , solid lines) current injection with magnitude  $a = 1$ . Blue lines show responses at 0.2 and yellow lines at 0.8 electrotonic distance. The time constant of the membrane was  $\tau = 20ms$ . **B**, Top panel, subthreshold proximal voltage variance as a function of electrotonic length for different input rates per unit electrotonic length: 200, 300, 400, and 500 Hz.  $a = 2.5$  and  $\tau = 20ms$ . Bottom panel, firing rate as a function of electrotonic length for different input rates per unit electrotonic length: 200, 300, 400, and 500 Hz.  $a = 2.5$  and  $\tau = 20ms$ . As in **A**, dashed lines for instantaneous and solid lines for filtered current injections. **C**, Output firing rate as a function of afferent rate for dendrites of different electrotonic lengths: 0.1, 1, and 10,000.  $a = 2.5$  and  $\tau = 20ms$ . As in **A**, dashed lines for instantaneous and solid lines for filtered current injections.

**Table S1.** Selected datasets from NeuroMorpho.Org

| Lab             | Species         | Region           | Cell type                                 |
|-----------------|-----------------|------------------|-------------------------------------------|
| Acsady          | rat             | ventral thalamus | modulated                                 |
| Alvarez         | rat             | spinal cord      | motoneuron                                |
| Amaral          | rat             | hippocampus      | pyramidal                                 |
| Araujo          | proechimys      | hippocampus      | pyramidal-like                            |
| Araujo          | rat             | hippocampus      | pyramidal                                 |
| Ascoli          | mouse           | spinal cord      | motoneuron                                |
| Ascoli          | rat             | basal forebrain  | choline acetyltransferase (ChAT)-positive |
| Ascoli          | rat             | basal forebrain  | neuropeptide Y (NPY)-positive             |
| Ascoli          | rat             | hippocampus      | not reported                              |
| Avendano        | rat             | brainstem        | Intersubnuclear neuron                    |
| Barrionuevo     | rat             | hippocampus      | pyramidal                                 |
| Bartos          | mouse           | hippocampus      | basket                                    |
| Bartos          | mouse           | hippocampus      | dendritic targeting                       |
| Bartos          | mouse           | hippocampus      | perisomatic targeting                     |
| Bianchi         | chimpanzee      | neocortex        | pyramidal                                 |
| Bikson          | rat             | neocortex        | not reported                              |
| Bikson          | rat             | neocortex        | pyramidal                                 |
| Blackman        | mouse           | neocortex        | basket                                    |
| Blackman        | mouse           | neocortex        | pyramidal                                 |
| Brown           | rat             | neocortex        | multipolar                                |
| Brown           | rat             | neocortex        | neurogliaform                             |
| Brown           | rat             | neocortex        | pyramidal                                 |
| Brown           | rat             | neocortex        | tripolar                                  |
| Brumberg        | mouse           | neocortex        | pyramidal                                 |
| Burke           | cat             | spinal cord      | motoneuron                                |
| Cameron         | cat             | spinal cord      | motoneuron                                |
| Cameron         | rat             | brainstem        | motoneuron                                |
| Cauli           | rat             | neocortex        | neuropeptide Y (NPY)-positive             |
| Cauli           | rat             | neocortex        | bipolar                                   |
| Cauli           | rat             | neocortex        | pyramidal                                 |
| Chalupa         | mouse           | retina           | ganglion                                  |
| Chmykhova       | frog            | spinal cord      | motoneuron                                |
| Chmykhova       | turtle          | spinal cord      | motoneuron                                |
| Cho             | mouse           | hippocampus      | granule                                   |
| Claiborne       | rat             | hippocampus      | granule                                   |
| Claiborne       | rat             | hippocampus      | pyramidal                                 |
| Collin          | pouched lamprey | retina           | ganglion                                  |
| Cossart-Bernard | rat             | hippocampus      | oriens-lacunosum moleculare               |
| Cossart-Bernard | rat             | hippocampus      | perforant pathway-associated              |
| Cossart-Bernard | rat             | hippocampus      | perisomatic targeting                     |
| Cossart-Bernard | rat             | hippocampus      | Schaffer-collateral associated            |
| Cossart-Bernard | rat             | hippocampus      | trilaminar                                |

| Lab             | Species                 | Region                    | Cell type                                  |
|-----------------|-------------------------|---------------------------|--------------------------------------------|
| Cox             | drosophila melanogaster | peripheral nervous system | multidendritic-dendritic arborization (DA) |
| De Koninck      | rat                     | neocortex                 | pyramidal                                  |
| Del Negro       | mouse                   | myelencephalon            | non-glutamatergic                          |
| Dendritica      | guinea pig              | cerebellum                | Purkinje                                   |
| Dendritica      | rat                     | basal ganglia             | dopaminergic                               |
| Dendritica      | rat                     | cerebellum                | Purkinje                                   |
| Dendritica      | rat                     | neocortex                 | pyramidal                                  |
| Destexhe        | cat                     | neocortex                 | pyramidal                                  |
| Destexhe        | rat                     | dorsal thalamus           | thalamocortical                            |
| Dusart          | mouse                   | cerebellum                | Purkinje                                   |
| Esclapez        | rat                     | hippocampus               | pyramidal                                  |
| Feldmeyer       | rat                     | neocortex                 | fast-spiking                               |
| Feldmeyer       | rat                     | neocortex                 | horizontal                                 |
| Feldmeyer       | rat                     | neocortex                 | inverted                                   |
| Feldmeyer       | rat                     | neocortex                 | multipolar                                 |
| Feldmeyer       | rat                     | neocortex                 | pyramidal                                  |
| Feldmeyer       | rat                     | neocortex                 | tangential                                 |
| Franca          | rat                     | neocortex                 | nitrgic                                    |
| Fukunaga        | mouse                   | main olfactory bulb       | mitral                                     |
| Fukunaga        | mouse                   | main olfactory bulb       | tufted                                     |
| Fyffe           | cat                     | spinal cord               | Ia inhibitory                              |
| Fyffe           | cat                     | spinal cord               | motoneuron                                 |
| Fyffe           | cat                     | spinal cord               | Renshaw                                    |
| Fyffe           | cat                     | spinal cord               | spinocerebellar                            |
| Garcia-Cairasco | rat                     | hippocampus               | granule                                    |
| Gonzalez-Burgos | monkey                  | neocortex                 | basket                                     |
| Gonzalez-Burgos | monkey                  | neocortex                 | double bouquet                             |
| Gonzalez-Burgos | monkey                  | neocortex                 | neurogliaform                              |
| Gonzalez-Burgos | monkey                  | neocortex                 | pyramidal                                  |
| Gonzalez-Burgos | mouse                   | neocortex                 | basket                                     |
| Gonzalez-Burgos | mouse                   | neocortex                 | pyramidal                                  |
| Groen           | rat                     | hippocampus               | pyramidal                                  |
| Gulyas          | rat                     | hippocampus               | calbindin (CB)-positive                    |
| Gulyas          | rat                     | hippocampus               | cholecystokinin (CCK)-positive             |
| Gulyas          | rat                     | hippocampus               | calretinin (CR)-positive                   |
| Gulyas          | rat                     | hippocampus               | pyramidal                                  |
| Gulyas          | rat                     | hippocampus               | parvalbumin (PV)-positive                  |
| Hajos           | mouse                   | hippocampus               | Chandelier                                 |
| Halnes          | mouse                   | thalamus                  | GABAergic                                  |
| Hay             | rat                     | neocortex                 | pyramidal                                  |
| Helmstaedter    | rat                     | neocortex                 | not reported                               |
| Helmstaedter    | rat                     | neocortex                 | pyramidal                                  |
| Henckens        | rat                     | amygdala                  | pyramidal                                  |
| Henckens        | rat                     | amygdala                  | stellate                                   |
| Henckens        | rat                     | hippocampus               | pyramidal                                  |

| Lab       | Species            | Region        | Cell type      |
|-----------|--------------------|---------------|----------------|
| Henckens  | rat                | neocortex     | pyramidal      |
| Henny     | rat                | basal ganglia | dopaminergic   |
| Irintchev | rat                | brainstem     | motoneuron     |
| Jacobs    | bottlenose dolphin | neocortex     | aspiny         |
| Jacobs    | bottlenose dolphin | neocortex     | pyramidal-like |
| Jacobs    | chimpanzee         | cerebellum    | basket         |
| Jacobs    | chimpanzee         | cerebellum    | Golgi          |
| Jacobs    | chimpanzee         | cerebellum    | granule        |
| Jacobs    | chimpanzee         | cerebellum    | Lugaro         |
| Jacobs    | chimpanzee         | cerebellum    | stellate       |
| Jacobs    | clouded leopard    | cerebellum    | basket         |
| Jacobs    | clouded leopard    | cerebellum    | granule        |
| Jacobs    | clouded leopard    | cerebellum    | Lugaro         |
| Jacobs    | clouded leopard    | cerebellum    | stellate       |
| Jacobs    | elephant           | cerebellum    | basket         |
| Jacobs    | elephant           | cerebellum    | Golgi          |
| Jacobs    | elephant           | cerebellum    | Lugaro         |
| Jacobs    | elephant           | cerebellum    | stellate       |
| Jacobs    | giraffe            | cerebellum    | basket         |
| Jacobs    | giraffe            | cerebellum    | Golgi          |
| Jacobs    | giraffe            | cerebellum    | granule        |
| Jacobs    | giraffe            | cerebellum    | Lugaro         |
| Jacobs    | giraffe            | cerebellum    | stellate       |
| Jacobs    | giraffe            | neocortex     | crab-like      |
| Jacobs    | giraffe            | neocortex     | neurogliaform  |
| Jacobs    | giraffe            | neocortex     | pyramidal      |
| Jacobs    | human              | cerebellum    | basket         |
| Jacobs    | human              | cerebellum    | Golgi          |
| Jacobs    | human              | cerebellum    | granule        |
| Jacobs    | human              | cerebellum    | Lugaro         |
| Jacobs    | human              | cerebellum    | stellate       |
| Jacobs    | human              | neocortex     | pyramidal      |
| Jacobs    | humpback whale     | cerebellum    | basket         |
| Jacobs    | humpback whale     | cerebellum    | Golgi          |
| Jacobs    | humpback whale     | cerebellum    | granule        |
| Jacobs    | humpback whale     | cerebellum    | Lugaro         |
| Jacobs    | humpback whale     | cerebellum    | stellate       |
| Jacobs    | humpback whale     | neocortex     | aspiny         |
| Jacobs    | humpback whale     | neocortex     | pyramidal-like |
| Jacobs    | humpback whale     | neocortex     | sternzelle     |
| Jacobs    | manatee            | cerebellum    | basket         |
| Jacobs    | manatee            | cerebellum    | stellate       |
| Jacobs    | minke whale        | neocortex     | aspiny         |
| Jacobs    | minke whale        | neocortex     | pyramidal      |
| Jacobs    | minke whale        | neocortex     | pyramidal-like |

| Lab       | Species        | Region        | Cell type             |
|-----------|----------------|---------------|-----------------------|
| Jacobs    | Siberian tiger | cerebellum    | basket                |
| Jacobs    | Siberian tiger | cerebellum    | Golgi                 |
| Jacobs    | Siberian tiger | cerebellum    | granule               |
| Jacobs    | Siberian tiger | cerebellum    | Lugaro                |
| Jacobs    | Siberian tiger | cerebellum    | stellate              |
| Jaeger    | rat            | basal ganglia | not reported          |
| Jaeger    | rat            | cerebellum    | glutamatergic         |
| Jaffe     | rat            | hippocampus   | not reported          |
| Jaffe     | rat            | hippocampus   | pyramidal             |
| Johnson   | domestic pig   | hippocampus   | granule               |
| Johnston  | rat            | hippocampus   | pyramidal             |
| Jonas     | rat            | hippocampus   | basket                |
| Kim       | mouse          | hippocampus   | pyramidal             |
| Kisvarday | cat            | neocortex     | pyramidal             |
| Kole      | rat            | hippocampus   | pyramidal             |
| Korngreen | rat            | neocortex     | pyramidal             |
| Krieger   | mouse          | neocortex     | pyramidal             |
| Kubota    | rat            | neocortex     | basket                |
| Lai       | mouse          | basal ganglia | medium spiny          |
| Lee       | mouse          | amygdala      | pyramidal             |
| Lee       | mouse          | hippocampus   | granule               |
| Lien      | rat            | hippocampus   | dendritic targeting   |
| Lien      | rat            | hippocampus   | perisomatic targeting |
| Luebke    | monkey         | neocortex     | pyramidal             |
| Luzzati   | guinea pig     | basal ganglia | Neuroblast            |
| Luzzati   | mouse          | basal ganglia | Neuroblast            |
| Maily     | rat            | basal ganglia | dopaminergic          |
| Markram   | rat            | neocortex     | basket                |
| Markram   | rat            | neocortex     | bipolar               |
| Markram   | rat            | neocortex     | bitufted              |
| Markram   | rat            | neocortex     | Chandelier            |
| Markram   | rat            | neocortex     | Descending            |
| Markram   | rat            | neocortex     | double bouquet        |
| Markram   | rat            | neocortex     | horizontal            |
| Markram   | rat            | neocortex     | Martinotti            |
| Markram   | rat            | neocortex     | neurogliaform         |
| Markram   | rat            | neocortex     | not reported          |
| Markram   | rat            | neocortex     | pyramidal             |
| Markram   | rat            | neocortex     | Small                 |
| Markram   | rat            | neocortex     | stellate              |
| Martone   | mouse          | cerebellum    | Purkinje              |
| Maxwell   | cat            | spinal cord   | spinocerebellar       |
| Meyer     | rat            | neocortex     | pyramidal             |
| Meyer     | rat            | neocortex     | stellate              |
| Miller    | salamander     | retina        | ganglion              |

| Lab                 | Species    | Region                    | Cell type                     |
|---------------------|------------|---------------------------|-------------------------------|
| Mizrahi             | mouse      | main olfactory bulb       | periglomerular                |
| Mustaparta-Lofaldli | moth       | antennal lobe             | olfactory                     |
| Nolan               | mouse      | entorhinal cortex         | stellate                      |
| Nusser              | rat        | main olfactory bulb       | deep short axon               |
| Nusser              | rat        | main olfactory bulb       | external tufted cell (ETC)    |
| OpenWorm            | C. elegans | pharyngeal nervous system | motoneuron                    |
| OpenWorm            | C. elegans | pharyngeal nervous system | pharyngeal                    |
| OpenWorm            | C. elegans | somatic nervous system    | amphid                        |
| OpenWorm            | C. elegans | somatic nervous system    | motoneuron                    |
| OpenWorm            | C. elegans | somatic nervous system    | not reported                  |
| OpenWorm            | C. elegans | somatic nervous system    | ring                          |
| OpenWorm            | C. elegans | somatic nervous system    | somatic                       |
| Poorthuis           | mouse      | neocortex                 | pyramidal                     |
| Poria               | mouse      | retina                    | ganglion                      |
| Povysheva           | rat        | neocortex                 | not reported                  |
| Rhode               | cat        | brainstem                 | vertical                      |
| Rose                | cat        | spinal cord               | motoneuron                    |
| Santhakumar         | rat        | hippocampus               | semilunar granule             |
| Sjostrom            | mouse      | neocortex                 | basket                        |
| Sjostrom            | mouse      | neocortex                 | Martinotti                    |
| Sjostrom            | mouse      | neocortex                 | pyramidal                     |
| Smith               | rat        | ventral striatum          | aspiny                        |
| Smith               | rat        | ventral striatum          | medium spiny                  |
| Smith-Koizumi       | rat        | myelencephalon            | inspiratory                   |
| Soltesz             | mouse      | hippocampus               | pyramidal                     |
| Somogyi             | rat        | hippocampus               | basket                        |
| Spruston            | rat        | hippocampus               | not reported                  |
| Spruston            | rat        | hippocampus               | pyramidal                     |
| Staiger             | rat        | neocortex                 | pyramidal                     |
| Staiger             | rat        | neocortex                 | stellate                      |
| Strettoi            | mouse      | retina                    | ganglion                      |
| Svoboda             | rat        | neocortex                 | pyramidal                     |
| Sztarker            | locust     | optic Lobe                | somatic                       |
| Tepper              | mouse      | basal ganglia             | tyrosine-hydroxylase-positive |
| Timofeev            | cat        | neocortex                 | pyramidal                     |
| Timofeev            | cat        | ventral thalamus          | thalamocortical               |
| Todd                | rat        | spinal cord               | projection neuron             |
| Turner              | rat        | hippocampus               | dendritic targeting           |



| Lab        | Species    | Region      | Cell type                        |
|------------|------------|-------------|----------------------------------|
| Turner     | rat        | hippocampus | granule                          |
| Turner     | rat        | hippocampus | pyramidal                        |
| Turner     | rat        | hippocampus | total molecular layer projecting |
| Vervaeke   | mouse      | cerebellum  | Golgi                            |
| Vuksic     | mouse      | hippocampus | granule                          |
| Wearne-Hof | monkey     | neocortex   | pyramidal                        |
| Wittner    | guinea pig | hippocampus | pyramidal                        |
| Zaitsev    | monkey     | neocortex   | pyramidal                        |
